# Supplementary material
Source: Royal Society of Chemistry journal article supplement (doi:10.1039/d5fo05258k)
Supplement: d5fo05258k2.pdf [file d5fo05258k2.pdf]

**Supplementary Table S1. Identification of the major constituents of CFE in positive and negative ion modes by HPLC–MS/MS**

| No. | Classification | Analyte Name                                                                            | R.T<br>(min) | Molecular<br>Formula                            | Molecular<br>Weight | Adduct                              | Theoretical<br>Mass | Measure<br>d Mass | Mass<br>error<br>(ppm) |
|-----|----------------|-----------------------------------------------------------------------------------------|--------------|-------------------------------------------------|---------------------|-------------------------------------|---------------------|-------------------|------------------------|
|     |                | Leucrose                                                                                | 1.06         | C <sub>12</sub> H <sub>22</sub> O <sub>11</sub> | 342.1               | [M+Na] <sup>+</sup>                 | 365.1054322         | 365.105           | 0.969                  |
|     |                | Itaconate                                                                               | 1.25         | C <sub>5</sub> H <sub>6</sub> O <sub>4</sub>    | 130                 | [M-H] <sup>-</sup>                  | 129.0193322         | 129.018           | 11.468                 |
|     |                | Citramalic acid                                                                         | 1.32         | C <sub>5</sub> H <sub>8</sub> O <sub>5</sub>    | 148                 | [M-H] <sup>-</sup>                  | 147.0298969         | 147.029           | 8.643                  |
|     |                | MEGLUTOL                                                                                | 1.51         | C <sub>6</sub> H <sub>10</sub> O <sub>5</sub>   | 162.1               | [M-H] <sup>-</sup>                  | 161.045547          | 161.044           | 7.579                  |
|     |                | GLUTARYLCARNITINE                                                                       | 1.55         | C <sub>12</sub> H <sub>21</sub> NO <sub>6</sub> | 275.1               | [M+H] <sup>+</sup>                  | 276.1441638         | 276.15            | 21.028                 |
|     |                | (4R)-3-methylidene-4-[(E)-3-methyl-4-(4-methyl-5-oxooxolan-2-yl)but-2-enyl]oxolan-2-one | 1.67         | C <sub>15</sub> H <sub>20</sub> O <sub>4</sub>  | 264.1               | [M-H-H <sub>2</sub> O] <sup>-</sup> | 245.118318          | 245.114           | 18.308                 |
|     |                | L-Propionylcarnitine                                                                    | 2.09         | C <sub>10</sub> H <sub>19</sub> NO <sub>4</sub> | 217.1               | [M+H] <sup>+</sup>                  | 218.1386845         | 218.139           | 1.079                  |
|     |                | MEVALONATE                                                                              | 2.4          | C <sub>6</sub> H <sub>12</sub> O <sub>4</sub>   | 148.1               | [M+HCO <sub>2</sub> ] <sup>-</sup>  | 193.0717617         | 193.071           | 4.775                  |
|     |                | Adipate                                                                                 | 5.03         | C <sub>6</sub> H <sub>10</sub> O <sub>4</sub>   | 146.1               | [M-H] <sup>-</sup>                  | 145.0506323         | 145.049           | 8.714                  |
|     |                | Pimelate                                                                                | 8.86         | C <sub>7</sub> H <sub>12</sub> O <sub>4</sub>   | 160.1               | [M-H] <sup>-</sup>                  | 159.0662824         | 159.065           | 8.011                  |
|     |                | FURFURYL BUTYRATE                                                                       | 9.21         | C <sub>9</sub> H <sub>12</sub> O <sub>3</sub>   | 168.1               | [M+HCO <sub>2</sub> ] <sup>-</sup>  | 213.0768471         | 213.073           | 156.337                |
|     |                | D-Leucic acid                                                                           | 9.58         | C <sub>6</sub> H <sub>12</sub> O <sub>3</sub>   | 132.1               | [M-H] <sup>-</sup>                  | 131.0713678         | 131.07            | 10.834                 |

|                                                                                                                          |      |   |                                                   |       |                                     |             |         |        |
|--------------------------------------------------------------------------------------------------------------------------|------|---|---------------------------------------------------|-------|-------------------------------------|-------------|---------|--------|
| NONANOATE                                                                                                                | 13.0 | 3 | C <sub>9</sub> H <sub>18</sub> O <sub>2</sub>     | 158.1 | [M+Na] <sup>+</sup>                 | 181.1199005 | 181.122 | 14.059 |
| Ethyl 3-phenylpropanoate                                                                                                 | 13.9 | 5 | C <sub>11</sub> H <sub>14</sub> O <sub>2</sub>    | 178.1 | [M+H] <sup>+</sup>                  | 179.1066561 | 179.107 | 0.732  |
| (3S,5R,6R,7E)-3,5,6-Trihydroxy-7-megastigmen-9-one                                                                       | 17.2 | 2 | C <sub>13</sub> H <sub>22</sub> O <sub>4</sub>    | 242.2 | [M+H-H <sub>2</sub> O] <sup>+</sup> | 225.148521  | 225.149 | 0.84   |
| Valproate                                                                                                                | 17.7 | 7 | C <sub>8</sub> H <sub>16</sub> O <sub>2</sub>     | 144.1 | [M+HCO <sub>2</sub> ] <sup>-</sup>  | 189.1132326 | 189.112 | 4.53   |
| AZELATE                                                                                                                  | 17.7 | 8 | C <sub>9</sub> H <sub>16</sub> O <sub>4</sub>     | 188.1 | [M-H] <sup>-</sup>                  | 187.0975825 | 187.097 | 4.606  |
| (3aR,4aS,5S,5aR,6aR)-5-(3-hydroxybutyl)-5a-methyl-3-methylidene-3a,4,4a,5,6,6a-hexahydrocyclopropa[f][1]benzofuran-2-one | 20.0 | 8 | C <sub>15</sub> H <sub>22</sub> O <sub>3</sub>    | 250.2 | [M+H-H <sub>2</sub> O] <sup>+</sup> | 233.1536063 | 233.154 | 0.761  |
| Isoalantolactone                                                                                                         | 20.5 | 2 | C <sub>15</sub> H <sub>20</sub> O <sub>2</sub>    | 232.1 | [M+H] <sup>+</sup>                  | 233.1536063 | 233.154 | 0.944  |
| 2-[(3S)-3-hydroxy-4a,8-dimethyl-2,3,4,5,6,7-hexahydro-1H-naphthalen-2-yl]prop-2-enoic acid                               | 21.5 | 5 | C <sub>15</sub> H <sub>22</sub> O <sub>3</sub>    | 250.2 | [M+HCO <sub>2</sub> ] <sup>-</sup>  | 295.1550974 | 295.155 | 0.621  |
| Sebacate                                                                                                                 | 22.2 | 4 | C <sub>10</sub> H <sub>18</sub> O <sub>4</sub>    | 202.1 | [M-H] <sup>-</sup>                  | 201.1132326 | 201.113 | 3.624  |
| 4-Hydroxynonenal alkyne                                                                                                  | 22.6 |   | C <sub>9</sub> H <sub>12</sub> O <sub>2</sub>     | 152.1 | [M+H-H <sub>2</sub> O] <sup>+</sup> | 135.0804414 | 135.081 | 0.996  |
| 13,14-Dihydro-15-ketotetranorprostaglandin F1.beta.                                                                      | 22.6 | 9 | C <sub>16</sub> H <sub>28</sub> O <sub>5</sub>    | 300.2 | [M-H] <sup>-</sup>                  | 299.1863975 | 299.186 | 0.764  |
| ESTRADIOL 3-(TRIMETHYLSILYL)                                                                                             | 23.1 |   | C <sub>21</sub> H <sub>32</sub> O <sub>2</sub> Si | 344.2 | [M-H] <sup>-</sup>                  | 343.2098803 | 343.212 | 6.645  |

| ETHER                                                                                  |      | 8 |                                                   |       |                                         |             |         |       |
|----------------------------------------------------------------------------------------|------|---|---------------------------------------------------|-------|-----------------------------------------|-------------|---------|-------|
| 2,3-Dinor-8-isoprostaglandin-F2.alpha.                                                 | 23.3 | 6 | C <sub>18</sub> H <sub>30</sub> O <sub>5</sub>    | 326.2 | [M+H] <sup>+</sup>                      | 327.2166005 | 327.217 | 0.844 |
| 18-Carboxydinorleukotriene B4                                                          | 23.4 | 9 | C <sub>18</sub> H <sub>26</sub> O <sub>6</sub>    | 338.2 | [M+H-<br>H <sub>2</sub> O] <sup>+</sup> | 321.1696503 | 321.167 | 7.35  |
| (2E,4E)-12-hydroxy-13-(hydroxymethyl)-<br>3,5,7-trimethyltetradeca-2,4-dienedioic acid | 23.7 |   | C <sub>18</sub> H <sub>30</sub> O <sub>6</sub>    | 342.2 | [M+H-<br>H <sub>2</sub> O] <sup>+</sup> | 325.2009504 | 325.201 | 1.608 |
| Rubescensin A                                                                          | 24.1 | 1 | C <sub>20</sub> H <sub>28</sub> O <sub>6</sub>    | 364.2 | [M+H] <sup>+</sup>                      | 365.1958651 | 365.193 | 6.744 |
| A1-Phytostane-I                                                                        | 24.1 | 7 | C <sub>18</sub> H <sub>28</sub> O <sub>4</sub>    | 308.2 |                                         |             |         |       |
| ESTRONE TRIMETHYL ETHER                                                                | 24.2 | 3 | C <sub>21</sub> H <sub>30</sub> O <sub>2</sub> Si | 342.2 | [M-H] <sup>-</sup>                      | 341.1942303 | 341.196 | 6.628 |
| Palmitic acid alkyne                                                                   | 25.5 | 3 | C <sub>16</sub> H <sub>28</sub> O <sub>2</sub>    | 252.2 | [M+Na] <sup>+</sup>                     | 275.1981508 | 275.201 | 9.108 |
| Undecanedioic acid                                                                     | 26.5 | 1 | C <sub>11</sub> H <sub>20</sub> O <sub>4</sub>    | 216.1 | [M-H] <sup>-</sup>                      | 215.1288827 | 215.128 | 3.553 |
| Dinor-12-oxophytodienoic acid                                                          | 27.6 | 3 | C <sub>16</sub> H <sub>24</sub> O <sub>3</sub>    | 264.2 | [M+H] <sup>+</sup>                      | 265.1798211 | 265.18  | 1.547 |
| Empenthrin                                                                             | 27.7 | 4 | C <sub>18</sub> H <sub>26</sub> O <sub>2</sub>    | 274.2 | [M+H] <sup>+</sup>                      | 275.2005565 | 275.201 | 0.676 |
| Hymeglusin                                                                             | 27.8 | 7 | C <sub>18</sub> H <sub>28</sub> O <sub>5</sub>    | 324.2 | [M+H] <sup>+</sup>                      | 325.2009504 | 325.201 | 1.418 |
| 9-Hydroperoxy-10E,12Z,15Z-octadecatrienoic                                             | 27.9 |   | C <sub>18</sub> H <sub>30</sub> O <sub>4</sub>    | 310.2 | [M+H-<br>H <sub>2</sub> O] <sup>-</sup> | 293.2111212 | 293.211 | 0.507 |

|                                                                                         |           |                                                |       |            |             |         |        |
|-----------------------------------------------------------------------------------------|-----------|------------------------------------------------|-------|------------|-------------|---------|--------|
| acid                                                                                    | 4         |                                                |       | H2O]+      |             |         |        |
| (10E,15Z)-9,12,13-trihydroxyoctadeca-10,15-dienoic acid                                 | 27.9<br>7 | C <sub>18</sub> H <sub>32</sub> O <sub>5</sub> | 328.2 | [M-H]-     | 327.2176977 | 327.218 | 1.054  |
| 8-[3-oxo-2-[(E)-pent-2-enyl]cyclopenten-1-yl]octanoic acid                              | 28.2<br>4 | C <sub>18</sub> H <sub>28</sub> O <sub>3</sub> | 292.2 | [M+H-H2O]+ | 275.2005565 | 275.201 | 0.797  |
| Costunolide                                                                             | 28.3<br>2 | C <sub>15</sub> H <sub>20</sub> O <sub>2</sub> | 232.1 | [M+H]+     | 233.1536063 | 233.154 | 0.914  |
| cis-.DELTA.2-11-Methyldodecenoic acid                                                   | 28.3<br>3 | C <sub>13</sub> H <sub>24</sub> O <sub>2</sub> | 212.2 | [M+Na]+    | 235.1668507 | 235.169 | 10.272 |
| h_92_oxabolone                                                                          | 28.5<br>7 | C <sub>18</sub> H <sub>26</sub> O <sub>3</sub> | 290.2 | [M+H-H2O]+ | 273.1849065 | 273.185 | 0.448  |
| 16,16-Dimethyl-6-ketoprostaglandin E1                                                   | 28.7<br>2 | C <sub>22</sub> H <sub>36</sub> O <sub>6</sub> | 396.3 | [M-H]-     | 395.2439124 | 395.244 | 0.44   |
| 16-Hydroxyhexadecanoic acid                                                             | 29.1<br>4 | C <sub>16</sub> H <sub>32</sub> O <sub>3</sub> | 272.2 | [M+Na]+    | 295.2243656 | 295.227 | 8.503  |
| (1R,4Z,9S)-4-(hydroxymethyl)-11,11-dimethyl-8-methylidenebicyclo[7.2.0]undec-4-en-3-one | 29.2      | C <sub>15</sub> H <sub>22</sub> O <sub>2</sub> | 234.2 | [M+HCO2]-  | 279.1601828 | 279.16  | 1.345  |
| 9,12-Octadecadiynoic acid                                                               | 29.2<br>1 | C <sub>18</sub> H <sub>28</sub> O <sub>2</sub> | 276.2 | [M+H]+     | 277.2162066 | 277.216 | 1.129  |
| (Z)-9,12,13-trihydroxyoctadec-15-enoic acid                                             | 29.2<br>2 | C <sub>18</sub> H <sub>34</sub> O <sub>5</sub> | 330.2 | [M+Na]+    | 353.2298449 | 353.231 | 2.894  |
| ARTENIMOL                                                                               | 29.2<br>4 | C <sub>15</sub> H <sub>24</sub> O <sub>5</sub> | 284.2 | [M-H-H2O]- | 265.1445327 | 265.144 | 1.111  |

|                                                                                                                                                  |      |   |                                                               |       |                                     |             |         |        |
|--------------------------------------------------------------------------------------------------------------------------------------------------|------|---|---------------------------------------------------------------|-------|-------------------------------------|-------------|---------|--------|
| 6,15-Diketo-13,14-dihydroprostaglandin F1.alpha.                                                                                                 | 29.3 | 1 | C <sub>20</sub> H <sub>34</sub> O <sub>6</sub>                | 370.2 | [M+H-H <sub>2</sub> O] <sup>+</sup> | 353.2322506 | 353.231 | 4.638  |
| Estriol                                                                                                                                          | 29.3 | 3 | C <sub>18</sub> H <sub>24</sub> O <sub>3</sub>                | 288.2 | [M+H] <sup>+</sup>                  | 289.1798211 | 289.18  | 0.993  |
| Dodecanedioate                                                                                                                                   | 29.3 | 5 | C <sub>12</sub> H <sub>22</sub> O <sub>4</sub>                | 230.2 | [M-H] <sup>-</sup>                  | 229.1445327 | 229.144 | 2.873  |
| 3-[(E)-[(3aR,4S,5S,6aR)-4-[(E,3R)-3-cyclohexyl-3-hydroxyprop-1-enyl]-5-hydroxy-3,3a,4,5,6,6a-hexahydro-1H-pentalen-2-ylidene]methyl]benzoic acid | 29.3 | 9 | C <sub>25</sub> H <sub>32</sub> O <sub>4</sub>                | 396.2 | [M-H] <sup>-</sup>                  | 395.2227831 | 395.227 | 10.548 |
| Phytprostane A1 (PPA1)                                                                                                                           | 29.4 | 3 | C <sub>18</sub> H <sub>28</sub> O <sub>3</sub>                | 292.2 | [M+H] <sup>+</sup>                  | 293.2111212 | 293.211 | 0.507  |
| 5-Isoprostaglandin-F2.alpha.-VI                                                                                                                  | 29.4 | 4 | C <sub>20</sub> H <sub>34</sub> O <sub>5</sub>                | 354.2 | [M-H] <sup>-</sup>                  | 353.2333477 | 353.233 | 1.223  |
| Chrysanthemic Acid, Ethyl Ester                                                                                                                  | 29.6 |   | C <sub>12</sub> H <sub>20</sub> O <sub>2</sub>                | 196.1 | [M-H] <sup>-</sup>                  | 195.1390534 | 195.138 | 4.76   |
| Prostaglandin D3                                                                                                                                 | 30.2 | 3 | C <sub>20</sub> H <sub>30</sub> O <sub>5</sub>                | 350.2 | [M+Na] <sup>+</sup>                 | 373.1985448 | 373.199 | 1.01   |
| 20-Trifluoroleukotriene B4                                                                                                                       | 30.3 |   | C <sub>20</sub> H <sub>29</sub> F <sub>3</sub> O <sub>4</sub> | 390.2 | [M+H-H <sub>2</sub> O] <sup>+</sup> | 373.1985058 | 373.199 | 0.876  |
| 12(13)Ep-9-KODE                                                                                                                                  | 30.4 | 9 | C <sub>18</sub> H <sub>30</sub> O <sub>4</sub>                | 310.2 | [M+H] <sup>+</sup>                  | 311.2216859 | 311.222 | 0.957  |
| 8-Iso-16-cyclohexyltetranorprostaglandin E2                                                                                                      | 30.6 | 3 | C <sub>22</sub> H <sub>34</sub> O <sub>5</sub>                | 378.2 | [M-H] <sup>-</sup>                  | 377.2333477 | 377.227 | 16.408 |
| NCGC00180485-03_C21H32O4_(5beta,8alpha,9beta,10alpha,13alpha)-18-Methoxy-18-oxokauran-17-oic                                                     | 31.0 |   |                                                               |       |                                     |             |         |        |

| acid                                                                                                                 |           |                                                 |       |                                         |             |         |        |
|----------------------------------------------------------------------------------------------------------------------|-----------|-------------------------------------------------|-------|-----------------------------------------|-------------|---------|--------|
| Valerenic acid                                                                                                       | 31.0<br>7 | C <sub>15</sub> H <sub>22</sub> O <sub>2</sub>  | 234.2 | [M+H] <sup>+</sup>                      | 235.1692564 | 235.169 | 0.873  |
| 15-Keto-prostaglandin F2a                                                                                            | 31.1<br>7 | C <sub>20</sub> H <sub>32</sub> O <sub>5</sub>  | 352.2 | [M+H] <sup>+</sup>                      | 353.2322506 | 353.232 | 2.402  |
| Ophiobolin A                                                                                                         | 31.2<br>8 | C <sub>25</sub> H <sub>36</sub> O <sub>4</sub>  | 400.3 | [M+H-<br>H <sub>2</sub> O] <sup>+</sup> | 383.2580714 | 383.259 | 70.657 |
| 7-[(2R)-2-[(E,3S,4S)-3-hydroxy-4-methylnon-1-en-6-ynyl]-5-oxopyrrolidin-1-yl]heptanoic acid                          | 31.4<br>9 | C <sub>21</sub> H <sub>33</sub> NO <sub>4</sub> | 363.2 | [M+H] <sup>+</sup>                      | 364.248235  | 364.248 | 1.031  |
| Ingenol                                                                                                              | 31.6<br>1 | C <sub>20</sub> H <sub>28</sub> O <sub>5</sub>  | 348.2 | [M+H] <sup>+</sup>                      | 349.2009504 | 349.198 | 7.135  |
| 17-trans-Prostaglandin E3                                                                                            | 31.6<br>3 | C <sub>20</sub> H <sub>30</sub> O <sub>5</sub>  | 350.2 | [M-H-<br>H <sub>2</sub> O] <sup>-</sup> | 331.1914829 | 331.191 | 1.969  |
| Carveol                                                                                                              | 31.6<br>9 | C <sub>10</sub> H <sub>16</sub> O               | 152.1 | [M+Na] <sup>+</sup>                     | 175.1093358 | 175.112 | 13.831 |
| Prostaglandin E2 serinolamide                                                                                        | 31.7<br>2 | C <sub>23</sub> H <sub>39</sub> NO <sub>6</sub> | 425.3 | [M+H] <sup>+</sup>                      | 426.2850144 | 426.272 | 31.768 |
| methyl (2E)-2-[(4aR,8aS)-4a-methyl-8-methylidene-3,4,5,6,7,8a-hexahydro-1H-naphthalen-2-ylidene]-3-hydroxypropanoate | 31.8<br>8 | C <sub>16</sub> H <sub>24</sub> O <sub>3</sub>  | 264.2 | [M+H-<br>H <sub>2</sub> O] <sup>+</sup> | 247.1692564 | 247.169 | 0.751  |
| Traumatic acid                                                                                                       | 31.9<br>2 | C <sub>12</sub> H <sub>20</sub> O <sub>4</sub>  | 228.1 | [M-H] <sup>-</sup>                      | 227.1288827 | 227.128 | 2.973  |
| 13-HPODE                                                                                                             | 31.9<br>7 | C <sub>18</sub> H <sub>32</sub> O <sub>4</sub>  | 312.2 | [M-H] <sup>-</sup>                      | 311.2227831 | 311.222 | 1.947  |

|                                                                      |           |                                                 |       |                                         |             |         |       |
|----------------------------------------------------------------------|-----------|-------------------------------------------------|-------|-----------------------------------------|-------------|---------|-------|
| 9-Oxo-10E,12Z,15Z-octadecatrienoic acid                              | 31.9<br>8 | C <sub>18</sub> H <sub>28</sub> O <sub>3</sub>  | 292.2 | [M+H-<br>H <sub>2</sub> O] <sup>+</sup> | 275.2005565 | 275.201 | 0.945 |
| Dinorprostaglandin E1                                                | 32.0<br>1 | C <sub>18</sub> H <sub>30</sub> O <sub>5</sub>  | 326.2 | [M-H-<br>H <sub>2</sub> O] <sup>-</sup> | 307.1914829 | 307.191 | 0.866 |
| 13-KODE                                                              | 32.1<br>2 | C <sub>18</sub> H <sub>30</sub> O <sub>3</sub>  | 294.2 | [M+H-<br>H <sub>2</sub> O] <sup>+</sup> | 277.2162066 | 277.217 | 1.247 |
| 10-Nitrooleic acid                                                   | 32.1<br>6 | C <sub>18</sub> H <sub>33</sub> NO <sub>4</sub> | 327.2 | [M+H] <sup>+</sup>                      | 328.248235  | 328.248 | 1.081 |
| Prostaglandin A2                                                     | 32.2<br>3 | C <sub>20</sub> H <sub>30</sub> O <sub>4</sub>  | 334.2 | [M+H-<br>H <sub>2</sub> O] <sup>+</sup> | 317.2111212 | 317.21  | 3.561 |
| 15-Deoxy-d-12,14-PGJ2                                                | 32.3<br>3 | C <sub>20</sub> H <sub>28</sub> O <sub>3</sub>  | 316.2 | [M+H] <sup>+</sup>                      | 317.2111212 | 317.211 | 0.739 |
| 13,14-Dihydro-15-ketoprostaglandin A2                                | 32.3<br>5 | C <sub>20</sub> H <sub>30</sub> O <sub>4</sub>  | 334.2 | [M-H] <sup>-</sup>                      | 333.207133  | 333.207 | 1.172 |
| NCGC00380425-01!1-(3,5-dihydroxyphenyl)-<br>12-hydroxytridecan-2-one | 32.3<br>6 | C <sub>19</sub> H <sub>30</sub> O <sub>4</sub>  | 322.2 | [M+H] <sup>+</sup>                      | 323.2216859 | 323.222 | 2.169 |
| 5-trans-Prostaglandin D2                                             | 32.3<br>9 | C <sub>20</sub> H <sub>32</sub> O <sub>5</sub>  | 352.2 | [M+H-<br>H <sub>2</sub> O] <sup>+</sup> | 335.2216859 | 335.221 | 3.141 |
| 9-HPODE                                                              | 32.4      | C <sub>18</sub> H <sub>32</sub> O <sub>4</sub>  | 312.2 | [M-H] <sup>-</sup>                      | 311.2227831 | 311.223 | 0.39  |
| 16a-Hydroxydehydroisoandrosterone                                    | 32.4<br>4 | C <sub>19</sub> H <sub>28</sub> O <sub>3</sub>  | 304.2 | [M+H] <sup>+</sup>                      | 305.2111212 | 305.211 | 1.294 |
| Walleminone                                                          | 32.6<br>8 | C <sub>15</sub> H <sub>24</sub> O <sub>3</sub>  | 252.2 | [M+H] <sup>+</sup>                      | 253.1798211 | 253.18  | 0.67  |
| Tetranor 12-HETE                                                     | 32.6      | C <sub>16</sub> H <sub>26</sub> O <sub>3</sub>  | 266.2 | [M+H] <sup>+</sup>                      | 267.1954711 | 267.196 | 0.461 |

|                                                                          |           |                                                               |       |                                         |             |         |        |  |
|--------------------------------------------------------------------------|-----------|---------------------------------------------------------------|-------|-----------------------------------------|-------------|---------|--------|--|
|                                                                          | 8         |                                                               |       |                                         |             |         |        |  |
| PGB2-[d4]                                                                | 32.7<br>1 | C <sub>20</sub> H <sub>30</sub> O <sub>4</sub>                | 334.2 | [M+Na] <sup>+</sup>                     | 357.2036301 | 357.204 | 0.747  |  |
| Bacillaene                                                               | 32.7<br>1 | C <sub>34</sub> H <sub>48</sub> N <sub>2</sub> O <sub>6</sub> | 580.4 | [M+H-<br>H <sub>2</sub> O] <sup>+</sup> | 563.347949  | 563.349 | 1.375  |  |
| Parthenolide                                                             | 32.7<br>1 | C <sub>15</sub> H <sub>20</sub> O <sub>3</sub>                | 248.1 | [M+H] <sup>+</sup>                      | 249.148521  | 249.149 | 0.742  |  |
| 1-METHOXYCARBONYL-4-(1,5-DIMETHYL-3-OXOHEX-4-ENYL)-CYCLOHEXENE           | 32.7<br>1 | C <sub>16</sub> H <sub>24</sub> O <sub>3</sub>                | 264.2 | [M-H] <sup>-</sup>                      | 263.1652682 | 263.165 | 1.678  |  |
| MGMG 16:3                                                                | 32.9<br>2 | C <sub>25</sub> H <sub>42</sub> O <sub>9</sub>                | 486.3 | [M+HCO<br>2] <sup>-</sup>               | 531.2810858 | 531.28  | 2.019  |  |
| 19-Nor-4-androstene-3,17-dione                                           | 32.9<br>7 | C <sub>18</sub> H <sub>24</sub> O <sub>2</sub>                | 272.2 | [M+H] <sup>+</sup>                      | 273.1849065 | 273.185 | 0.486  |  |
| 1-(5Z,8Z,11Z,14Z-Eicosatetraenoyl)-sn-glycero-3-phospho-(1'-sn-glycerol) | 33.0<br>6 | C <sub>26</sub> H <sub>45</sub> O <sub>9</sub> P              | 532.3 | [M-H] <sup>-</sup>                      | 531.2728432 | 531.278 | 10.271 |  |
| 1-(5Z,8Z,11Z,14Z-Eicosatetraenoyl)-sn-glycero-3-phosphate                | 33.1<br>6 | C <sub>23</sub> H <sub>39</sub> O <sub>7</sub> P              | 458.2 | [M-H-<br>H <sub>2</sub> O] <sup>-</sup> | 439.2254991 | 439.225 | 0.907  |  |
| 17-Keto-4(Z),7(Z),10(Z),13(Z),15(E),19(Z)-docosahexaenoic acid           | 33.2<br>8 | C <sub>22</sub> H <sub>30</sub> O <sub>3</sub>                | 342.2 | [M+H-<br>H <sub>2</sub> O] <sup>+</sup> | 325.2162066 | 325.219 | 7.227  |  |
| 9-KODE                                                                   | 33.3<br>8 | C <sub>18</sub> H <sub>30</sub> O <sub>3</sub>                | 294.2 | [M+H] <sup>+</sup>                      | 295.2267713 | 295.227 | 1.842  |  |
| 5,8,11-Eicosatriynoic acid                                               | 33.4      | C <sub>20</sub> H <sub>28</sub> O <sub>2</sub>                | 300.2 | [M+H] <sup>+</sup>                      | 301.2162066 | 301.217 | 3.819  |  |
| Bicyclo-prostaglandin E1                                                 | 33.4      | C <sub>20</sub> H <sub>32</sub> O <sub>4</sub>                | 336.2 | [M+Na] <sup>+</sup>                     | 359.2192802 | 359.219 | 0.462  |  |

|                                   |           |                                                      |       |                |             |         |        |
|-----------------------------------|-----------|------------------------------------------------------|-------|----------------|-------------|---------|--------|
|                                   | 3         |                                                      |       |                |             |         |        |
| Hellebrigenin-D-glucose           | 33.4<br>8 | C <sub>30</sub> H <sub>42</sub> O <sub>11</sub>      | 578.3 | [M-H]-         | 577.2654357 | 577.268 | 5.105  |
| Roridin A                         | 33.4<br>8 | C <sub>29</sub> H <sub>40</sub> O <sub>9</sub>       | 532.3 | [M+HCO<br>2]-  | 577.2654357 | 577.268 | 5.105  |
| Tetrahydrocorticosterone          | 33.5<br>5 | C <sub>21</sub> H <sub>34</sub> O <sub>4</sub>       | 350.2 | [M+H]+         | 351.252986  | 351.253 | 0.914  |
| Phosphatidylcholine lyso 20:5     | 33.5<br>7 | C <sub>28</sub> H <sub>48</sub> NO <sub>7</sub><br>P | 541.3 | [M+H]+         | 542.324116  | 542.327 | 5.347  |
| Phosphatidylcholine lyso 18:3     | 33.5<br>7 | C <sub>26</sub> H <sub>48</sub> NO <sub>7</sub><br>P | 517.3 | [M+HCO<br>2]-  | 562.3150424 | 562.315 | 1.272  |
| LPC(18:2)                         | 33.6      | C <sub>26</sub> H <sub>50</sub> NO <sub>7</sub><br>P | 519.3 | [M+Na]+        | 542.3217103 | 542.329 | 14.151 |
| 15-keto-PGF1alpha                 | 33.6<br>1 | C <sub>20</sub> H <sub>34</sub> O <sub>5</sub>       | 354.2 | [M+H-<br>H2O]+ | 337.237336  | 337.243 | 18.091 |
| (1S)-(+)-Camphorquinone           | 33.6<br>1 | C <sub>10</sub> H <sub>14</sub> O <sub>2</sub>       | 166.1 | [M+H-<br>H2O]+ | 149.0960915 | 149.096 | 1.003  |
| Stearidonic acid                  | 33.7<br>4 | C <sub>18</sub> H <sub>28</sub> O <sub>2</sub>       | 276.2 | [M+H-<br>H2O]+ | 259.2056419 | 259.206 | 0.637  |
| LysoPC(16:0)                      | 33.9<br>2 | C <sub>24</sub> H <sub>50</sub> NO <sub>7</sub><br>P | 495.3 | [M+Na]+        | 518.3217103 | 518.324 | 5.042  |
| Docosahexaenoic acid methyl ester | 33.9<br>8 | C <sub>23</sub> H <sub>34</sub> O <sub>2</sub>       | 342.3 | [M+Na]+        | 365.245101  | 365.24  | 73.761 |
| (-)-Carvophyllene oxide           | 34.0      | C <sub>15</sub> H <sub>24</sub> O                    | 220.2 | [M+H-          | 203.1794272 | 203.18  | 1.421  |

|                                                                                                              |           |                                                      |       |                                         |             |         |       |
|--------------------------------------------------------------------------------------------------------------|-----------|------------------------------------------------------|-------|-----------------------------------------|-------------|---------|-------|
|                                                                                                              | 4         |                                                      |       | H <sub>2</sub> O]+                      |             |         |       |
| 13-HOTrE                                                                                                     | 34.0<br>6 | C <sub>18</sub> H <sub>30</sub> O <sub>3</sub>       | 294.2 | [M+H] <sup>+</sup>                      | 295.2267713 | 295.227 | 0.745 |
| 9-HOTrE                                                                                                      | 34.0<br>6 | C <sub>18</sub> H <sub>30</sub> O <sub>3</sub>       | 294.2 | [M+HCO<br>2] <sup>-</sup>               | 339.2176977 | 339.217 | 1.479 |
| (9Z,12E)-15,16-dihydroxyoctadeca-9,12-dienoic acid                                                           | 34.1<br>1 | C <sub>18</sub> H <sub>32</sub> O <sub>4</sub>       | 312.2 | [M-H-<br>H <sub>2</sub> O] <sup>-</sup> | 293.2122184 | 293.212 | 1.153 |
| 13-Hydroperoxy-9Z,11E-octadecadienoic acid                                                                   | 34.2      | C <sub>18</sub> H <sub>32</sub> O <sub>4</sub>       | 312.2 | [M-H-<br>H <sub>2</sub> O] <sup>-</sup> | 293.2122184 | 293.212 | 1.389 |
| 5-[5-(acetyloxymethyl)-1,2,4a-trimethyl-7-oxo-3,4,8,8a-tetrahydro-2H-naphthalen-1-yl]-3-methylpentanoic acid | 34.3      | C <sub>22</sub> H <sub>34</sub> O <sub>5</sub>       | 378.2 | [M-H-<br>H <sub>2</sub> O] <sup>-</sup> | 359.2227831 | 359.222 | 1.277 |
| Cortisol                                                                                                     | 34.3<br>1 | C <sub>21</sub> H <sub>30</sub> O <sub>5</sub>       | 362.2 | [M+H] <sup>+</sup>                      | 363.2166005 | 363.231 | 46.57 |
| Lipoxin B4                                                                                                   | 34.3<br>8 | C <sub>20</sub> H <sub>32</sub> O <sub>5</sub>       | 352.2 | [M-H] <sup>-</sup>                      | 351.2176977 | 351.217 | 1.318 |
| Lyso-PC 18:1(9Z)                                                                                             | 34.4<br>3 | C <sub>26</sub> H <sub>52</sub> NO <sub>7</sub><br>P | 521.3 | [M+H] <sup>+</sup>                      | 522.3554161 | 522.356 | 2.086 |
| LysoPE(16:0/0:0)                                                                                             | 34.4<br>8 | C <sub>21</sub> H <sub>44</sub> NO <sub>7</sub><br>P | 453.3 | [M-H] <sup>-</sup>                      | 452.2782629 | 452.28  | 4.707 |
| Curcumol                                                                                                     | 34.5<br>8 | C <sub>15</sub> H <sub>24</sub> O <sub>2</sub>       | 236.2 | [M+H-<br>H <sub>2</sub> O] <sup>+</sup> | 219.1743418 | 219.174 | 0.566 |
| (9Z,12Z,15Z)-9,12,15-Octadecatrienoic acid, 3-(hexopyranosyloxy)-2-hydroxypropyl ester                       | 34.6      | C <sub>27</sub> H <sub>46</sub> O <sub>9</sub>       | 514.3 | [M-H] <sup>-</sup>                      | 513.3069066 | 513.305 | 3.409 |

|                                       |           |                                                      |       |                                         |             |         |        |
|---------------------------------------|-----------|------------------------------------------------------|-------|-----------------------------------------|-------------|---------|--------|
| LysoPC(17:0)                          | 34.6<br>2 | C <sub>25</sub> H <sub>52</sub> NO <sub>7</sub><br>P | 509.3 | [M+Na] <sup>+</sup>                     | 532.3373603 | 532.347 | 18.882 |
| Monopalmitolein (9c)                  | 34.6<br>9 | C <sub>19</sub> H <sub>36</sub> O <sub>4</sub>       | 328.3 | [M+H-<br>H <sub>2</sub> O] <sup>+</sup> | 377.2686361 | 377.269 | 0.207  |
| Manoalide                             | 34.7<br>3 | C <sub>25</sub> H <sub>36</sub> O <sub>5</sub>       | 416.3 | [M+H] <sup>+</sup>                      | 417.2635507 | 417.265 | 20.256 |
| 2-(14,15-Epoxyeicosatrienoyl)glycerol | 34.7<br>4 | C <sub>23</sub> H <sub>38</sub> O <sub>5</sub>       | 394.3 | [M+H-<br>H <sub>2</sub> O] <sup>+</sup> | 377.2686361 | 377.269 | 0.735  |
| LPA(18:1(9Z)/0:0)                     | 34.8<br>2 | C <sub>21</sub> H <sub>41</sub> O <sub>7</sub> P     | 436.3 | [M+HCO<br>2] <sup>-</sup>               | 481.2571931 | 481.257 | 1.576  |
| Phosphatidylcholine lyso 16:0         | 34.8<br>7 | C <sub>24</sub> H <sub>50</sub> NO <sub>7</sub><br>P | 495.3 | [M+HCO<br>2] <sup>-</sup>               | 540.3306924 | 540.334 | 6.503  |
| METHYL RICINOLEATE                    | 34.8<br>9 | C <sub>19</sub> H <sub>36</sub> O <sub>3</sub>       | 312.3 | [M+H] <sup>+</sup>                      | 313.2737215 | 313.274 | 0.428  |
| LysoPC(0:0/18:0)                      | 35.2<br>3 | C <sub>26</sub> H <sub>54</sub> NO <sub>7</sub><br>P | 523.4 | [M+H] <sup>+</sup>                      | 524.3710662 | 524.369 | 5.98   |
| 4-HDoHE                               | 35.2<br>8 | C <sub>22</sub> H <sub>32</sub> O <sub>3</sub>       | 344.2 | [M+H] <sup>+</sup>                      | 345.2424213 | 345.242 | 0.602  |
| Linoelaidic acid                      | 35.2<br>9 | C <sub>18</sub> H <sub>32</sub> O <sub>2</sub>       | 280.2 | [M+Na] <sup>+</sup>                     | 303.229451  | 303.232 | 7.784  |
| EPA                                   | 35.3<br>1 | C <sub>20</sub> H <sub>30</sub> O <sub>2</sub>       | 302.2 | [M+H-<br>H <sub>2</sub> O] <sup>+</sup> | 285.2212920 | 285.225 | 13.042 |
| 12(S)-HETE-d8                         | 35.3<br>8 | C <sub>20</sub> H <sub>32</sub> O <sub>3</sub>       | 320.2 | [M+H-<br>H <sub>2</sub> O] <sup>+</sup> | 303.2318567 | 303.232 | 1.739  |

|                                                                                                                                  |           |                                                    |       |                                         |             |         |        |
|----------------------------------------------------------------------------------------------------------------------------------|-----------|----------------------------------------------------|-------|-----------------------------------------|-------------|---------|--------|
| 11-HETE                                                                                                                          | 35.3<br>9 | C <sub>20</sub> H <sub>32</sub> O <sub>3</sub>     | 320.2 | [M+H-<br>H <sub>2</sub> O] <sup>+</sup> | 303.2318567 | 303.232 | 1.739  |
| Dodeca-2(E),4(E)-dienoic acid                                                                                                    | 35.4<br>7 | C <sub>12</sub> H <sub>20</sub> O <sub>2</sub>     | 196.1 | [M+H-<br>H <sub>2</sub> O] <sup>+</sup> | 179.1430416 | 179.143 | 0.668  |
| Ricinoleic acid                                                                                                                  | 35.5      | C <sub>18</sub> H <sub>34</sub> O <sub>3</sub>     | 298.3 | [M-H] <sup>-</sup>                      | 297.2435185 | 297.243 | 1.402  |
| [(1R,2S,3S,4R,4aS)-2,3-dihydroxy-3,4a,8,8-tetramethyl-4-[(E)-3-oxobut-1-enyl]-2,4,5,6,7,8a-hexahydro-1H-naphthalen-1-yl] acetate | 35.5<br>3 | C <sub>20</sub> H <sub>32</sub> O <sub>5</sub>     | 352.2 | [M+HCO<br>2] <sup>-</sup>               | 397.223177  | 397.226 | 7.232  |
| 1-Palmitoyl-2-hydroxy-sn-glycero-3-phospho-(1'-rac-glycerol)                                                                     | 35.6<br>3 | C <sub>22</sub> H <sub>44</sub> NaO <sub>9</sub> P | 506.5 | [M+Na] <sup>+</sup>                     | 507.2693404 | 507.27  | 1.428  |
| 3-Hydroxymyristic acid                                                                                                           | 35.7      | C <sub>14</sub> H <sub>28</sub> O <sub>3</sub>     | 244.2 | [M-H] <sup>-</sup>                      | 243.1965683 | 243.196 | 2.939  |
| 15S-Hydroxy-8Z,11Z,13E-eicosatrienoic acid                                                                                       | 35.9      | C <sub>20</sub> H <sub>34</sub> O <sub>3</sub>     | 322.3 | [M-H] <sup>-</sup>                      | 321.2435185 | 321.242 | 4.206  |
| Prostaglandin A1 ethyl ester                                                                                                     | 36.0<br>1 | C <sub>22</sub> H <sub>36</sub> O <sub>4</sub>     | 364.3 | [M+H] <sup>+</sup>                      | 365.2686361 | 365.268 | 10.492 |
| O-Arachidonoylglycidol                                                                                                           | 36.1<br>2 | C <sub>23</sub> H <sub>36</sub> O <sub>3</sub>     | 360.3 | [M+Na] <sup>+</sup>                     | 383.2556657 | 383.25  | 55.057 |
| MG(0:0/16:0/0:0)                                                                                                                 | 36.1<br>6 | C <sub>19</sub> H <sub>38</sub> O <sub>4</sub>     | 330.3 | [M+H] <sup>+</sup>                      | 331.2842861 | 331.284 | 1.061  |
| Dioctyl sulfosuccinate                                                                                                           | 36.1<br>7 | C <sub>20</sub> H <sub>38</sub> O <sub>7</sub> S   | 422.2 | [M-H] <sup>-</sup>                      | 421.2265481 | 421.226 | 0.773  |
| 1-Oleoyl-2-hydroxy-sn-glycero-3-phospho-(1'-rac-glycerol)                                                                        | 36.3<br>3 | C <sub>24</sub> H <sub>47</sub> O <sub>9</sub> P   | 510.3 | [M-H] <sup>-</sup>                      | 509.2884933 | 509.288 | 1.193  |
| Prostaglandin F2.alpha. Ethanolamide                                                                                             | 36.4      | C <sub>22</sub> H <sub>39</sub> NO <sub>5</sub>    | 397.3 | [M+H] <sup>-</sup>                      | 380.2795351 | 380.284 | 12.174 |

|                                            |      |    |                                                | H2O)+ |            |             |         |        |
|--------------------------------------------|------|----|------------------------------------------------|-------|------------|-------------|---------|--------|
| (Z)-3-Hydroxyhexadec-7-enoic acid          | 36.4 | 1  | C <sub>16</sub> H <sub>30</sub> O <sub>3</sub> | 270.2 | [2M-H]-    | 539.4317132 | 539.431 | 1.402  |
| 9,10-DiHOME                                | 36.4 | 7  | C <sub>18</sub> H <sub>34</sub> O <sub>4</sub> | 314.2 | [M+H-H2O)+ | 297.2424213 | 297.243 | 0.812  |
| Halocynthiaxanthin                         | 36.6 | 1  | C <sub>40</sub> H <sub>54</sub> O <sub>4</sub> | 598.4 | [M+H)+     | 599.4094867 | 599.408 | 4.148  |
| MLS001076098-01!                           | 36.6 | 3  | C <sub>22</sub> H <sub>32</sub> O <sub>3</sub> | 344.2 | [M+H)+     | 345.2424213 | 345.241 | 5.219  |
| Norgestrel                                 | 36.6 | 5  | C <sub>21</sub> H <sub>28</sub> O <sub>2</sub> | 312.2 | [M-H]-     | 311.2016537 | 311.202 | 1.056  |
| 16,16-Dimethylprostaglandin A2             | 36.7 | 2  | C <sub>22</sub> H <sub>34</sub> O <sub>4</sub> | 362.2 | [M+H)+     | 363.252986  | 363.253 | 0.536  |
| Glyceryl linolenate                        | 36.9 | 5  | C <sub>21</sub> H <sub>36</sub> O <sub>4</sub> | 352.3 | [M+H)+     | 353.2686361 | 353.269 | 0.644  |
| 11-Hydroxy-12E,14Z-eicosadienoic acid      | 37   | 37 | C <sub>20</sub> H <sub>36</sub> O <sub>3</sub> | 324.3 | [M-H]-     | 323.2591686 | 323.259 | 1.281  |
| 12'-Apozeaxanthin                          | 37.0 | 3  | C <sub>25</sub> H <sub>34</sub> O <sub>2</sub> | 366.3 | [M+H)+     | 367.2631568 | 367.256 | 22.433 |
| Pacificanone A                             | 37.3 | 8  | C <sub>20</sub> H <sub>34</sub> O <sub>3</sub> | 322.3 | [M+Na)+    | 345.2400156 | 345.241 | 2.712  |
| Pinolenic acid                             | 37.3 | 8  | C <sub>18</sub> H <sub>30</sub> O <sub>2</sub> | 278.2 | [M+H-H2O)+ | 261.221292  | 261.221 | 0.701  |
| 15S-Hydroperoxy-11Z,13E-eicosadienoic acid | 37.4 | 8  | C <sub>20</sub> H <sub>36</sub> O <sub>4</sub> | 340.3 | [M+H)+     | 341.2686361 | 341.266 | 6.837  |

|                                                                                             |           |                                                 |       |                                         |             |         |        |
|---------------------------------------------------------------------------------------------|-----------|-------------------------------------------------|-------|-----------------------------------------|-------------|---------|--------|
| 1-Arachidonoylglycerol                                                                      | 37.7      | C <sub>23</sub> H <sub>38</sub> O <sub>4</sub>  | 378.3 | [M+H] <sup>+</sup>                      | 379.2842861 | 379.282 | 5.772  |
| 9(10)-Epoxy-12Z-octadecenoic acid                                                           | 37.7<br>3 | C <sub>18</sub> H <sub>32</sub> O <sub>3</sub>  | 296.2 | [M+H-<br>H <sub>2</sub> O] <sup>+</sup> | 279.2318567 | 279.232 | 1.465  |
| 16(S)-HETE                                                                                  | 37.8<br>6 | C <sub>20</sub> H <sub>32</sub> O <sub>3</sub>  | 320.2 | [M-H-<br>H <sub>2</sub> O] <sup>-</sup> | 301.2173037 | 301.217 | 1.232  |
| 8-HETE                                                                                      | 38.0<br>7 | C <sub>20</sub> H <sub>32</sub> O <sub>3</sub>  | 320.2 | [M-H-<br>H <sub>2</sub> O] <sup>-</sup> | 301.2173037 | 301.217 | 1.232  |
| [(2Z)-6-hydroxy-2,6-dimethylocta-2,7-dienyl]<br>2-(5-ethenyl-5-methyloxolan-2-yl)propanoate | 38.1<br>2 | C <sub>20</sub> H <sub>32</sub> O <sub>4</sub>  | 336.2 | [M+HCO<br>2] <sup>-</sup>               | 381.2282624 | 381.231 | 8.273  |
| Kinoprene                                                                                   | 38.1<br>7 | C <sub>18</sub> H <sub>28</sub> O <sub>2</sub>  | 276.2 | [M+H-<br>H <sub>2</sub> O] <sup>+</sup> | 259.2056419 | 259.206 | 1.055  |
| Palmitamide                                                                                 | 38.2<br>6 | C <sub>16</sub> H <sub>33</sub> NO              | 255.3 | [M+H] <sup>+</sup>                      | 256.2634911 | 256.264 | 0.687  |
| Lichestylic acid                                                                            | 38.3<br>4 | C <sub>18</sub> H <sub>34</sub> O <sub>3</sub>  | 298.3 | [2M-H] <sup>-</sup>                     | 595.4943134 | 595.498 | 7.603  |
| OLEATE                                                                                      | 38.7<br>1 | C <sub>18</sub> H <sub>34</sub> O <sub>2</sub>  | 282.3 | [M+Na] <sup>+</sup>                     | 305.245101  | 305.248 | 8.062  |
| Oleamide                                                                                    | 38.7<br>3 | C <sub>18</sub> H <sub>35</sub> NO              | 281.3 | [M+H] <sup>+</sup>                      | 282.2791412 | 282.279 | 0.725  |
| AA-[d8]                                                                                     | 38.7<br>6 | C <sub>20</sub> H <sub>32</sub> O <sub>2</sub>  | 304.2 | [M+H] <sup>+</sup>                      | 305.2475067 | 305.248 | 0.74   |
| 14(15)-Epoxyeicosadienoic Acid                                                              | 38.7<br>7 | C <sub>20</sub> H <sub>34</sub> O <sub>3</sub>  | 322.3 | [M+H] <sup>+</sup>                      | 323.2580714 | 323.258 | 1.235  |
| Khivorin                                                                                    | 39.3      | C <sub>32</sub> H <sub>42</sub> O <sub>10</sub> | 586.3 | [M+Na] <sup>+</sup>                     | 609.2670182 | 609.267 | 11.397 |

|                                       | 1    |                                                               |       |                                         |             |         |        |
|---------------------------------------|------|---------------------------------------------------------------|-------|-----------------------------------------|-------------|---------|--------|
| 25-Hydroxyvitamin D2                  | 39.4 |                                                               |       |                                         |             |         |        |
|                                       | 2    | C <sub>28</sub> H <sub>44</sub> O <sub>2</sub>                | 412.3 | [M+H] <sup>+</sup>                      | 413.3414071 | 413.327 | 35.596 |
| Erucamide                             | 41.7 |                                                               |       |                                         |             |         |        |
|                                       | 7    | C <sub>22</sub> H <sub>43</sub> NO                            | 337.3 | [M+H] <sup>+</sup>                      | 338.3417414 | 338.342 | 0.446  |
| ACETOACETATE                          | 1.03 | C <sub>4</sub> H <sub>6</sub> O <sub>3</sub>                  | 102   | [2M+H] <sup>+</sup>                     | 205.0706646 | 205.071 | 17.854 |
| L-Glu                                 | 1.05 | C <sub>3</sub> H <sub>9</sub> NO <sub>4</sub>                 | 147.1 | [M+H] <sup>+</sup>                      | 148.0604342 | 148.06  | 0.535  |
| Gln-Glu                               | 1.1  | C <sub>10</sub> H <sub>17</sub> N <sub>3</sub> O <sub>6</sub> | 275.1 | [M-H] <sup>-</sup>                      | 274.1044588 | 274.104 | 0.743  |
| METHYLMALONATE                        | 1.11 | C <sub>4</sub> H <sub>6</sub> O <sub>4</sub>                  | 118   | [M+HCO<br>2] <sup>-</sup>               | 163.0248115 | 163.024 | 7.731  |
| N-Methylthreonine                     | 1.12 | C <sub>5</sub> H <sub>11</sub> NO <sub>3</sub>                | 133.1 | [M+H-<br>H <sub>2</sub> O] <sup>+</sup> | 116.070605  | 116.071 | 2.259  |
| Valine                                | 1.13 | C <sub>5</sub> H <sub>11</sub> NO <sub>2</sub>                | 117.1 | [M+H] <sup>+</sup>                      | 118.086255  | 118.087 | 2.087  |
| Malate                                | 1.13 | C <sub>4</sub> H <sub>6</sub> O <sub>5</sub>                  | 134   | [M-H] <sup>-</sup>                      | 133.0142468 | 133.014 | 18.246 |
| Pro                                   | 1.14 | C <sub>3</sub> H <sub>9</sub> NO <sub>2</sub>                 | 115.1 | [M+H] <sup>+</sup>                      | 116.070605  | 116.071 | 2.659  |
| AC-LYS-OH                             | 1.16 | C <sub>8</sub> H <sub>16</sub> N <sub>2</sub> O <sub>3</sub>  | 188.1 | [M+H] <sup>+</sup>                      | 189.1233688 | 189.124 | 4.029  |
| Glu-Gln                               | 1.17 | C <sub>10</sub> H <sub>17</sub> N <sub>3</sub> O <sub>6</sub> | 275.1 | [M+H-<br>H <sub>2</sub> O] <sup>+</sup> | 258.108447  | 258.109 | 5.136  |
| Methyl 1-aminocyclopropanecarboxylate | 1.17 | C <sub>3</sub> H <sub>9</sub> NO <sub>2</sub>                 | 115.1 | [M+H] <sup>+</sup>                      | 116.070605  | 116.071 | 2.268  |
| CITRATE                               | 1.18 | C <sub>6</sub> H <sub>8</sub> O <sub>7</sub>                  | 192   | [M+Na] <sup>+</sup>                     | 215.0162233 | 215.016 | 1.158  |
| DL-Threonine methyl ester             | 1.18 | C <sub>5</sub> H <sub>11</sub> NO <sub>3</sub>                | 133.1 | [M+H-<br>H <sub>2</sub> O] <sup>+</sup> | 116.070605  | 116.071 | 2.268  |

|                                |      |                                                               |       |                                     |             |         |             |
|--------------------------------|------|---------------------------------------------------------------|-------|-------------------------------------|-------------|---------|-------------|
| Pro-Gly                        | 1.19 | C <sub>7</sub> H <sub>12</sub> N <sub>2</sub> O <sub>3</sub>  | 172.1 | [M+H-H <sub>2</sub> O] <sup>+</sup> | 155.081504  | 155.082 | 0.65        |
| Arginine                       | 1.22 | C <sub>6</sub> H <sub>14</sub> N <sub>4</sub> O <sub>2</sub>  | 174.1 | [M+H] <sup>+</sup>                  | 175.1189521 | 175.119 | 1.333       |
| PIDOLATE                       | 1.26 | C <sub>3</sub> H <sub>7</sub> NO <sub>3</sub>                 | 129   | [M+H] <sup>+</sup>                  | 130.0498695 | 130.05  | 1.75        |
| Leu-Gly                        | 1.27 | C <sub>8</sub> H <sub>16</sub> N <sub>2</sub> O <sub>3</sub>  | 188.1 | [M+H] <sup>+</sup>                  | 189.1233688 | 189.124 | 4.025       |
| 4-ACETAMIDOBUTANOATE           | 1.38 | C <sub>6</sub> H <sub>11</sub> NO <sub>3</sub>                | 145.1 | [M+H-H <sub>2</sub> O] <sup>+</sup> | 128.070605  | 128.071 | 1.23        |
| .alpha.-L-Glu-L-Asp            | 1.38 | C <sub>9</sub> H <sub>14</sub> N <sub>2</sub> O <sub>7</sub>  | 262.1 | [M+H-H <sub>2</sub> O] <sup>+</sup> | 245.0768126 | 245.078 | 4.022       |
| Alanine-2,3,3,3-d <sub>4</sub> | 1.49 | C <sub>3</sub> H <sub>7</sub> NO <sub>2</sub>                 | 93.1  | [M+HCO <sub>2</sub> ] <sup>-</sup>  | 134.0458813 | 134.046 | 0.799       |
| Ile-Ser                        | 1.52 | C <sub>9</sub> H <sub>18</sub> N <sub>2</sub> O <sub>4</sub>  | 218.1 | [M+H] <sup>+</sup>                  | 219.1339335 | 219.134 | 1.656       |
| Leucenol                       | 1.52 | C <sub>8</sub> H <sub>10</sub> N <sub>2</sub> O <sub>4</sub>  | 198.1 | [M+HCO <sub>2</sub> ] <sup>-</sup>  | 243.0622597 | 243.062 | 2.151       |
| N-Acetylglutamate              | 1.52 | C <sub>7</sub> H <sub>11</sub> NO <sub>5</sub>                | 189.1 | [M-H] <sup>-</sup>                  | 188.056446  | 188.056 | 4.372       |
| PyroGlu-Val                    | 1.55 | C <sub>10</sub> H <sub>16</sub> N <sub>2</sub> O <sub>4</sub> | 228.1 | [M+H] <sup>+</sup>                  | 229.1182834 | 229.119 | 1.449       |
| N-Fructosyl isoleucine         | 1.57 | C <sub>12</sub> H <sub>23</sub> NO <sub>7</sub>               | 293.1 | [M+H] <sup>+</sup>                  | 294.1547285 | 294.125 | 145.85<br>5 |
| Arg-Leu                        | 1.59 | C <sub>12</sub> H <sub>25</sub> N <sub>5</sub> O <sub>3</sub> | 287.2 | [M+H] <sup>+</sup>                  | 288.2030161 | 288.201 | 8.78        |
| Isovalerylglycine              | 1.61 | C <sub>7</sub> H <sub>13</sub> NO <sub>3</sub>                | 159.1 | [M+Na] <sup>+</sup>                 | 182.078764  | 182.08  | 20.477      |
| Ile-Asp-Arg                    | 1.61 | C <sub>16</sub> H <sub>30</sub> N <sub>6</sub> O <sub>6</sub> | 402.2 | [M-H] <sup>-</sup>                  | 401.2154062 | 401.218 | 7.034       |
| Tyr                            | 1.62 | C <sub>9</sub> H <sub>11</sub> NO <sub>3</sub>                | 181.1 | [M+H] <sup>+</sup>                  | 182.0811697 | 182.081 | 1.065       |

|                           |      |                                                                    |       |                             |             |         |        |
|---------------------------|------|--------------------------------------------------------------------|-------|-----------------------------|-------------|---------|--------|
| TYROSINE                  | 1.62 | C <sub>9</sub> H <sub>11</sub> NO <sub>3</sub>                     | 181.1 | [M-H]-                      | 180.0666168 | 180.065 | 6.42   |
| Ile-Asn                   | 1.63 | C <sub>10</sub> H <sub>19</sub> N <sub>3</sub> O <sub>4</sub>      | 245.1 | [M+H]+                      | 246.1448325 | 246.145 | 0.676  |
| Gln-Met                   | 1.63 | C <sub>10</sub> H <sub>19</sub> N <sub>3</sub> O <sub>4</sub><br>S | 277.1 | [M+H]+                      | 278.1169035 | 278.117 | 7.115  |
| ASUCCIN                   | 1.67 | C <sub>4</sub> H <sub>6</sub> O <sub>4</sub>                       | 118   | [M-H]-                      | 117.0193322 | 117.018 | 12.694 |
| Ile                       | 1.75 | C <sub>6</sub> H <sub>13</sub> NO <sub>2</sub>                     | 131.1 | [M+H]+                      | 132.1019051 | 132.102 | 3.028  |
| Ile-Met(O)                | 1.82 | C <sub>11</sub> H <sub>22</sub> N <sub>2</sub> O <sub>4</sub><br>S | 278.1 | [M+H]+                      | 279.1373046 | 279.137 | 1.499  |
| Thr-Ile                   | 1.99 | C <sub>10</sub> H <sub>20</sub> N <sub>2</sub> O <sub>4</sub>      | 232.1 | [M+HCO<br>2]-               | 277.14051   | 277.144 | 13.136 |
| Glutarate                 | 2.41 | C <sub>5</sub> H <sub>8</sub> O <sub>4</sub>                       | 132   | [M+HCO<br>2]-               | 177.0404616 | 177.039 | 5.826  |
| Phe-Ser                   | 2.47 | C <sub>12</sub> H <sub>16</sub> N <sub>2</sub> O <sub>4</sub>      | 252.1 | [M+H]+                      | 253.1182834 | 253.119 | 1.622  |
| Ile-Glu                   | 2.64 | C <sub>11</sub> H <sub>20</sub> N <sub>2</sub> O <sub>5</sub>      | 260.1 | [M+H]+                      | 261.1444982 | 261.145 | 1.238  |
| Val-Val                   | 2.79 | C <sub>10</sub> H <sub>20</sub> N <sub>2</sub> O <sub>3</sub>      | 216.1 | [M+H]+                      | 217.154669  | 217.155 | 1.546  |
| Gln-Tyr                   | 2.86 | C <sub>14</sub> H <sub>19</sub> N <sub>3</sub> O <sub>5</sub>      | 309.1 | [M+H]+                      | 310.1397472 | 310.136 | 14.218 |
| Phe                       | 3.06 | C <sub>9</sub> H <sub>11</sub> NO <sub>2</sub>                     | 165.1 | [M+H]+                      | 166.086255  | 166.086 | 1.355  |
| Val-Pro                   | 3.09 | C <sub>10</sub> H <sub>18</sub> N <sub>2</sub> O <sub>3</sub>      | 214.1 | [M+H-<br>H <sub>2</sub> O]+ | 197.1284542 | 197.129 | 1.244  |
| N-Fructosyl phenylalanine | 3.42 | C <sub>15</sub> H <sub>21</sub> NO <sub>7</sub>                    | 327.1 | [M+H]+                      | 328.1390785 | 328.151 | 37.897 |
| Ser-Leu                   | 3.55 | C <sub>9</sub> H <sub>18</sub> N <sub>2</sub> O <sub>4</sub>       | 218.1 | [M+H]+                      | 219.1339335 | 219.134 | 1.656  |

|                       |      |                                                               |       |                                         |             |         |        |
|-----------------------|------|---------------------------------------------------------------|-------|-----------------------------------------|-------------|---------|--------|
| Asn-Leu               | 3.63 | C <sub>10</sub> H <sub>19</sub> N <sub>3</sub> O <sub>4</sub> | 245.1 | [M+H] <sup>+</sup>                      | 246.1448325 | 246.143 | 8.446  |
| L-Alanyl-L-norleucine | 3.7  | C <sub>9</sub> H <sub>18</sub> N <sub>2</sub> O <sub>3</sub>  | 202.1 | [M-H] <sup>-</sup>                      | 201.124466  | 201.124 | 3.765  |
| Acetylproline         | 3.98 | C <sub>7</sub> H <sub>11</sub> NO <sub>3</sub>                | 157.1 | [M+H] <sup>+</sup>                      | 158.0811697 | 158.081 | 1.55   |
| 4-Oxohexanoate        | 4.04 | C <sub>6</sub> H <sub>10</sub> O <sub>3</sub>                 | 130.1 | [M-H] <sup>-</sup>                      | 129.0557177 | 129.054 | 11.419 |
| Gly-Leu               | 4.1  | C <sub>8</sub> H <sub>16</sub> N <sub>2</sub> O <sub>3</sub>  | 188.1 | [M+H] <sup>+</sup>                      | 189.1233688 | 189.124 | 1.81   |
| Ile-Asp               | 4.33 | C <sub>10</sub> H <sub>18</sub> N <sub>2</sub> O <sub>5</sub> | 246.1 | [M+H-<br>H <sub>2</sub> O] <sup>+</sup> | 229.1182834 | 229.119 | 1.449  |
| Asp-Leu               | 4.33 | C <sub>10</sub> H <sub>18</sub> N <sub>2</sub> O <sub>5</sub> | 246.1 | [M-H] <sup>-</sup>                      | 245.1142952 | 245.114 | 1.542  |
| Phe-Ala               | 4.45 | C <sub>12</sub> H <sub>16</sub> N <sub>2</sub> O <sub>3</sub> | 236.1 | [M+H] <sup>+</sup>                      | 237.1233688 | 237.124 | 1.591  |
| Tyr-Pro               | 4.84 | C <sub>14</sub> H <sub>18</sub> N <sub>2</sub> O <sub>4</sub> | 278.1 | [M+H] <sup>+</sup>                      | 279.1339335 | 279.136 | 5.876  |
| Leu-Glu               | 4.9  | C <sub>11</sub> H <sub>20</sub> N <sub>2</sub> O <sub>5</sub> | 260.1 | [M+H] <sup>+</sup>                      | 261.1444982 | 261.145 | 0.941  |
| Ile-Val               | 5.21 | C <sub>11</sub> H <sub>22</sub> N <sub>2</sub> O <sub>3</sub> | 230.2 | [M+H] <sup>+</sup>                      | 231.170319  | 231.171 | 1.523  |
| Pro-Leu               | 5.23 | C <sub>11</sub> H <sub>20</sub> N <sub>2</sub> O <sub>3</sub> | 228.1 | [M+H] <sup>+</sup>                      | 229.154669  | 229.155 | 1.315  |
| Ser-Phe               | 5.34 | C <sub>12</sub> H <sub>16</sub> N <sub>2</sub> O <sub>4</sub> | 252.1 | [M+H] <sup>+</sup>                      | 253.1182834 | 253.119 | 1.666  |
| Phe-Thr               | 5.77 | C <sub>13</sub> H <sub>18</sub> N <sub>2</sub> O <sub>4</sub> | 266.1 | [M+H] <sup>+</sup>                      | 267.1339335 | 267.134 | 1.658  |
| Ala-Phe               | 5.98 | C <sub>12</sub> H <sub>16</sub> N <sub>2</sub> O <sub>3</sub> | 236.1 | [M+H] <sup>+</sup>                      | 237.1233688 | 237.124 | 1.233  |
| Leu-Pro               | 6.14 | C <sub>11</sub> H <sub>20</sub> N <sub>2</sub> O <sub>3</sub> | 228.1 | [M+H] <sup>+</sup>                      | 229.154669  | 229.155 | 1.615  |
| ASP-PHE               | 6.23 | C <sub>13</sub> H <sub>16</sub> N <sub>2</sub> O <sub>5</sub> | 280.1 | [M+H] <sup>+</sup>                      | 281.1131981 | 281.112 | 5.015  |
| Val-Leu               | 6.94 | C <sub>11</sub> H <sub>22</sub> N <sub>2</sub> O <sub>3</sub> | 230.2 | [M+H] <sup>+</sup>                      | 231.170319  | 231.171 | 1.146  |

|                                        |           |                                                               |       |                                         |             |         |        |
|----------------------------------------|-----------|---------------------------------------------------------------|-------|-----------------------------------------|-------------|---------|--------|
| 2-amino-9-methanesulfinylnonanoic acid | 7.89      | C <sub>10</sub> H <sub>21</sub> NO <sub>3</sub><br>S          | 235.1 | [M+H] <sup>+</sup>                      | 236.131491  | 236.128 | 13.074 |
| Phe-Val                                | 8.24      | C <sub>14</sub> H <sub>20</sub> N <sub>2</sub> O <sub>3</sub> | 264.1 | [M+H] <sup>+</sup>                      | 265.154669  | 265.155 | 1.79   |
| L-Tyrosine, ethyl ester                | 8.32      | C <sub>11</sub> H <sub>15</sub> NO <sub>3</sub>               | 209.1 | [M+H] <sup>+</sup>                      | 210.1124698 | 210.113 | 1.64   |
| Tyr-Leu                                | 9.08      | C <sub>15</sub> H <sub>22</sub> N <sub>2</sub> O <sub>4</sub> | 294.2 | [M+H] <sup>+</sup>                      | 295.1652336 | 295.166 | 1.597  |
| Val-Phe                                | 9.31      | C <sub>14</sub> H <sub>20</sub> N <sub>2</sub> O <sub>3</sub> | 264.1 | [M+H] <sup>+</sup>                      | 265.154669  | 265.155 | 1.372  |
| Thr-Val-Leu                            | 9.39      | C <sub>15</sub> H <sub>29</sub> N <sub>3</sub> O <sub>5</sub> | 331.2 | [M+H] <sup>+</sup>                      | 332.2179975 | 332.218 | 0.992  |
| Cyclo(L-Val-L-Pro)                     | 9.87      | C <sub>10</sub> H <sub>16</sub> N <sub>2</sub> O <sub>2</sub> | 196.1 | [M+HCO<br>2] <sup>-</sup>               | 241.1193806 | 241.119 | 2.177  |
| Glu-Ile                                | 9.91      | C <sub>11</sub> H <sub>20</sub> N <sub>2</sub> O <sub>5</sub> | 260.1 | [M+H-<br>H <sub>2</sub> O] <sup>+</sup> | 243.1339335 | 243.134 | 1.517  |
| Ile-Leu                                | 10.0<br>1 | C <sub>12</sub> H <sub>24</sub> N <sub>2</sub> O <sub>3</sub> | 244.2 | [M+H] <sup>+</sup>                      | 245.1859691 | 245.186 | 1.132  |
| Leu-Leu                                | 10.9<br>1 | C <sub>12</sub> H <sub>24</sub> N <sub>2</sub> O <sub>3</sub> | 244.2 | [M-H] <sup>-</sup>                      | 243.1714162 | 243.171 | 1.861  |
| 3-Oxo-1,8-octanedicarboxylic acid      | 10.9<br>4 | C <sub>10</sub> H <sub>16</sub> O <sub>5</sub>                | 216.1 | [M-H-<br>H <sub>2</sub> O] <sup>-</sup> | 197.0819325 | 197.081 | 4.258  |
| N-Acetyl-D-norleucine                  | 11.3<br>2 | C <sub>8</sub> H <sub>15</sub> NO <sub>3</sub>                | 173.1 | [M-H] <sup>-</sup>                      | 172.0979169 | 172.097 | 6.658  |
| 3-Methoxycyclohexanecarboxylic acid    | 11.7      | C <sub>8</sub> H <sub>14</sub> O <sub>3</sub>                 | 158.1 | [M+H-<br>H <sub>2</sub> O] <sup>+</sup> | 141.0910061 | 141.091 | 0.999  |
| Ile-Phe                                | 12.6<br>3 | C <sub>15</sub> H <sub>22</sub> N <sub>2</sub> O <sub>3</sub> | 278.2 | [M+H] <sup>+</sup>                      | 279.170319  | 279.17  | 4.636  |

|                               |           |                                                               |       |                                         |             |         |       |
|-------------------------------|-----------|---------------------------------------------------------------|-------|-----------------------------------------|-------------|---------|-------|
| Glu-Phe                       | 12.6<br>7 | C <sub>14</sub> H <sub>18</sub> N <sub>2</sub> O <sub>5</sub> | 294.1 | [M-H-<br>H <sub>2</sub> O]-             | 275.1037305 | 275.104 | 1.026 |
| AC-PHE-OH                     | 13.1<br>8 | C <sub>11</sub> H <sub>13</sub> NO <sub>3</sub>               | 207.1 | [M-H]-                                  | 206.0822668 | 206.082 | 3.256 |
| Gly-Pro                       | 13.2<br>3 | C <sub>7</sub> H <sub>12</sub> N <sub>2</sub> O <sub>3</sub>  | 174.1 | [M-H]-                                  | 173.0819325 | 173.081 | 6.746 |
| Leu-Gly-Leu                   | 13.9<br>7 | C <sub>14</sub> H <sub>27</sub> N <sub>3</sub> O <sub>4</sub> | 301.2 | [M+H] <sup>+</sup>                      | 302.2074328 | 302.208 | 1.225 |
| o-Tyrosine                    | 14.0<br>6 | C <sub>9</sub> H <sub>11</sub> NO <sub>3</sub>                | 181.1 | [M+H-<br>H <sub>2</sub> O] <sup>+</sup> | 164.070605  | 164.071 | 0.665 |
| 3-Cyclohexyl-1,1-dimethylurea | 18.1<br>7 | C <sub>9</sub> H <sub>18</sub> N <sub>2</sub> O               | 170.1 | [M+H] <sup>+</sup>                      | 171.1491896 | 171.149 | 0.975 |
| His-Thr-Lys                   | 23.8<br>5 | C <sub>16</sub> H <sub>28</sub> N <sub>6</sub> O <sub>5</sub> | 384.2 | [M+H-<br>H <sub>2</sub> O] <sup>+</sup> | 367.2088298 | 367.21  | 2.359 |
| IAA-Val                       | 23.9<br>4 | C <sub>15</sub> H <sub>18</sub> N <sub>2</sub> O <sub>3</sub> | 274.1 | [M+H-<br>H <sub>2</sub> O] <sup>+</sup> | 257.1284542 | 257.129 | 0.906 |
| Denatonium                    | 25.2<br>5 | C <sub>21</sub> H <sub>28</sub> N <sub>2</sub> O              | 324.2 | [M+H] <sup>+</sup>                      | 325.22744   | 325.226 | 6.07  |
| Ser-Lys-Arg                   | 26.7      | C <sub>15</sub> H <sub>31</sub> N <sub>7</sub> O <sub>5</sub> | 389.2 | [M-H-<br>H <sub>2</sub> O]-             | 370.220826  | 370.226 | 14.14 |
| 3-oxo-C12 homoserine lactone  | 29.4<br>7 | C <sub>16</sub> H <sub>27</sub> NO <sub>4</sub>               | 297.2 | [M+H] <sup>+</sup>                      | 298.2012848 | 298.201 | 1.016 |
| Lys-Pro-Arg                   | 29.5<br>1 | C <sub>17</sub> H <sub>33</sub> N <sub>7</sub> O <sub>4</sub> | 399.3 | [M+H-<br>H <sub>2</sub> O] <sup>+</sup> | 382.2561143 | 382.258 | 6.25  |

|                                         |           |                                                               |       |                                     |             |         |        |
|-----------------------------------------|-----------|---------------------------------------------------------------|-------|-------------------------------------|-------------|---------|--------|
| Texanol                                 | 30.9<br>5 | C <sub>12</sub> H <sub>24</sub> O <sub>3</sub>                | 216.2 | [M+Na] <sup>+</sup>                 | 239.1617653 | 239.164 | 10.567 |
| Lauramidopropylbetaine                  | 30.9<br>6 | C <sub>19</sub> H <sub>38</sub> N <sub>2</sub> O <sub>3</sub> | 342.3 | [M+H] <sup>+</sup>                  | 343.2955195 | 343.296 | 0.746  |
| Lys-His-Lys                             | 30.9<br>7 | C <sub>18</sub> H <sub>33</sub> N <sub>7</sub> O <sub>4</sub> | 411.3 | [M+H] <sup>+</sup>                  | 412.266679  | 412.269 | 6.586  |
| Myristamidopropyl betaine               | 32.8<br>5 | C <sub>21</sub> H <sub>42</sub> N <sub>2</sub> O <sub>3</sub> | 370.3 | [M+H] <sup>+</sup>                  | 371.3268197 | 371.327 | 0.764  |
| Lauryl sulfate                          | 33.3<br>7 | C <sub>12</sub> H <sub>26</sub> O <sub>4</sub> S              | 266.2 | [M-H] <sup>-</sup>                  | 265.1479039 | 265.147 | 1.721  |
| C12-AE1S (TENTATIVE)                    | 34.5<br>4 | C <sub>14</sub> H <sub>30</sub> O <sub>5</sub> S              | 310.2 | [M-H] <sup>-</sup>                  | 309.1741186 | 309.174 | 1.16   |
| Diethylene glycol dodecyl ether sulfate | 35.0<br>6 | C <sub>16</sub> H <sub>34</sub> O <sub>6</sub> S              | 354.2 | [M-H] <sup>-</sup>                  | 353.2003334 | 353.2   | 1.566  |
| Palmitoylglycine                        | 35.2<br>4 | C <sub>18</sub> H <sub>35</sub> NO <sub>3</sub>               | 313.3 | [M+H-H <sub>2</sub> O] <sup>+</sup> | 296.2584057 | 296.244 | 50.501 |
| Myristyl sulfate                        | 35.7<br>1 | C <sub>14</sub> H <sub>30</sub> O <sub>4</sub> S              | 294.2 | [M-H] <sup>-</sup>                  | 293.179204  | 293.182 | 26.37  |
| N-Oleoyl-L-serine                       | 36.1<br>9 | C <sub>21</sub> H <sub>39</sub> NO <sub>4</sub>               | 369.3 | [M-H] <sup>-</sup>                  | 368.2806323 | 368.28  | 1.477  |
| Oleyl sarcosine                         | 38.3<br>5 | C <sub>21</sub> H <sub>39</sub> NO <sub>3</sub>               | 353.3 | [M-H] <sup>-</sup>                  | 352.2857177 | 352.285 | 1.434  |
| 4-Pyridoxate                            | 1.08      | C <sub>8</sub> H <sub>9</sub> NO <sub>4</sub>                 | 183.1 | [M+H] <sup>+</sup>                  | 184.0604342 | 184.064 | 21.359 |
| Vitamin C                               | 1.14      | C <sub>6</sub> H <sub>8</sub> O <sub>6</sub>                  | 176   | [2M-H] <sup>-</sup>                 | 351.0568995 | 351.058 | 5.338  |

|                     |      |                                                               |       |                                     |             |         |        |
|---------------------|------|---------------------------------------------------------------|-------|-------------------------------------|-------------|---------|--------|
| .beta.-Homoproline  | 1.18 | C <sub>6</sub> H <sub>11</sub> NO <sub>2</sub>                | 129.1 | [M+H] <sup>+</sup>                  | 130.086255  | 130.086 | 1.253  |
| Isonicotinate       | 1.44 | C <sub>6</sub> H <sub>5</sub> NO <sub>2</sub>                 | 123   | [M+H] <sup>+</sup>                  | 124.0393049 | 124.039 | 1.555  |
| Niacinamide         | 1.44 | C <sub>6</sub> H <sub>6</sub> N <sub>2</sub> O                | 122   | [M+H] <sup>+</sup>                  | 123.0552893 | 123.056 | 1.787  |
| Adenine             | 1.46 | C <sub>5</sub> H <sub>5</sub> N <sub>5</sub>                  | 135.1 | [M+H] <sup>+</sup>                  | 136.0617716 | 136.062 | 1.295  |
| Xanthine            | 1.46 | C <sub>5</sub> H <sub>4</sub> N <sub>4</sub> O <sub>2</sub>   | 152   | [M-H] <sup>-</sup>                  | 151.0261489 | 151.025 | 9.251  |
| 2-Furoate           | 1.92 | C <sub>5</sub> H <sub>4</sub> O <sub>3</sub>                  | 112   | [M+H] <sup>+</sup>                  | 113.0233204 | 113.024 | 3.494  |
| 5-HYDROXYTRYPTOPHAN | 1.99 | C <sub>11</sub> H <sub>12</sub> N <sub>2</sub> O <sub>3</sub> | 220.1 | [M+H] <sup>+</sup>                  | 221.0920687 | 221.092 | 3.82   |
| Hypoxanthine        | 2.77 | C <sub>5</sub> H <sub>4</sub> N <sub>4</sub> O                | 136   | [M+H] <sup>+</sup>                  | 137.0457872 | 137.046 | 1.156  |
| FAPy-adenine        | 2.81 | C <sub>5</sub> H <sub>7</sub> N <sub>5</sub> O                | 153.1 | [M+H-H <sub>2</sub> O] <sup>+</sup> | 136.0617716 | 136.062 | 2.949  |
| Indoline            | 3.1  | C <sub>8</sub> H <sub>9</sub> N                               | 119.1 | [M+H] <sup>+</sup>                  | 120.0807757 | 120.081 | 2.967  |
| Guanine             | 3.1  | C <sub>5</sub> H <sub>5</sub> N <sub>5</sub> O                | 151   | [M+H] <sup>+</sup>                  | 152.0566862 | 152.057 | 0.502  |
| Indacaterol         | 3.1  | C <sub>24</sub> H <sub>28</sub> N <sub>2</sub> O <sub>3</sub> | 392.4 | [M+HCO <sub>2</sub> ] <sup>-</sup>  | 437.2081956 | 437.214 | 12.997 |
| 4-Chromanone        | 3.2  | C <sub>9</sub> H <sub>8</sub> O <sub>2</sub>                  | 148.1 | [M+H-H <sub>2</sub> O] <sup>+</sup> | 131.0491413 | 131.049 | 1.499  |
| MEVALOLACTONE       | 4.07 | C <sub>6</sub> H <sub>10</sub> O <sub>3</sub>                 | 130.1 | [M+H] <sup>+</sup>                  | 131.0702706 | 131.071 | 2.394  |
| Serotonin           | 5.78 | C <sub>10</sub> H <sub>12</sub> N <sub>2</sub> O              | 176.1 | [M+H-H <sub>2</sub> O] <sup>+</sup> | 159.0916748 | 159.092 | 0.591  |
| Indole              | 5.79 | C <sub>8</sub> H <sub>7</sub> N                               | 117.1 | [M+H] <sup>+</sup>                  | 118.0651257 | 118.065 | 2.496  |
| Indolelactic acid   | 5.82 | C <sub>11</sub> H <sub>11</sub> NO <sub>3</sub>               | 205.1 | [M+H] <sup>-</sup>                  | 188.070605  | 188.071 | 1.361  |

|                                                                                |      |                                                                     |       |                            |             |         |        |  |
|--------------------------------------------------------------------------------|------|---------------------------------------------------------------------|-------|----------------------------|-------------|---------|--------|--|
|                                                                                |      |                                                                     |       |                            | H2O)+       |         |        |  |
| Trp                                                                            | 5.83 | C <sub>11</sub> H <sub>12</sub> N <sub>2</sub> O <sub>2</sub>       | 204.1 | [M+H] <sup>+</sup>         | 205.0971541 | 205.097 | 1.269  |  |
| 2-TRIMETHYLSILYLOXY-N-(2-(DIETHYLAMINO)ETHYL)-4-QUINOLINECARBOXAMIDE           | 6.95 | C <sub>19</sub> H <sub>29</sub> N <sub>3</sub> O <sub>2</sub><br>Si | 359.2 | [M+H] <sup>+</sup>         | 360.2101802 | 360.213 | 8.463  |  |
| Lyxoflavin                                                                     | 11.9 |                                                                     |       |                            |             |         |        |  |
|                                                                                | 9    | C <sub>17</sub> H <sub>20</sub> N <sub>4</sub> O <sub>6</sub>       | 376.1 | [M+H] <sup>+</sup>         | 377.1455608 | 377.146 | 0.884  |  |
| gamma-Undecalactone                                                            | 13.0 |                                                                     |       |                            |             |         |        |  |
|                                                                                | 8    | C <sub>11</sub> H <sub>20</sub> O <sub>2</sub>                      | 184.1 | [M+Na] <sup>+</sup>        | 207.1355506 | 207.138 | 12.476 |  |
| PYRIDOXINE                                                                     | 13.8 |                                                                     |       |                            |             |         |        |  |
|                                                                                | 1    | C <sub>8</sub> H <sub>11</sub> NO <sub>3</sub>                      | 169.1 | [M-H-<br>H2O] <sup>-</sup> | 150.0560521 | 150.055 | 8.876  |  |
| Quinolin-7-ol                                                                  | 14.5 |                                                                     |       |                            |             |         |        |  |
|                                                                                | 3    | C <sub>9</sub> H <sub>7</sub> NO                                    | 145.1 | [M-H] <sup>-</sup>         | 144.0454874 | 144.044 | 9.172  |  |
| Indole-6-carboxaldehyde                                                        | 14.6 |                                                                     |       |                            |             |         |        |  |
|                                                                                | 7    | C <sub>9</sub> H <sub>7</sub> NO                                    | 145.1 | [M+H] <sup>+</sup>         | 146.0600403 | 146.06  | 0.984  |  |
| Loliolide                                                                      | 15.3 | C <sub>11</sub> H <sub>16</sub> O <sub>3</sub>                      | 196.1 | [M+H] <sup>+</sup>         | 197.1172208 | 197.117 | 1.002  |  |
| 3-ETHOXYCARBONYL-6-ISOPROPYL-1-OXA-3,3A,4,5,6,7,8,8A-OCTAHYDROAZULEN-2(1H)-ONE | 15.5 |                                                                     |       |                            |             |         |        |  |
|                                                                                | 3    | C <sub>15</sub> H <sub>24</sub> O <sub>4</sub>                      | 268.2 | [M+HCO<br>2] <sup>-</sup>  | 313.1656621 | 313.166 | 0.476  |  |
| 1,5,6,7-TETRAHYDRO-4H-INDOL-4-ONE                                              | 21.1 |                                                                     |       |                            |             |         |        |  |
|                                                                                | 3    | C <sub>8</sub> H <sub>9</sub> NO                                    | 135.1 | [M+HCO<br>2] <sup>-</sup>  | 180.0666168 | 180.065 | 6.42   |  |
| tubermycin B                                                                   | 25.5 |                                                                     |       |                            |             |         |        |  |
|                                                                                | 9    | C <sub>13</sub> H <sub>8</sub> N <sub>2</sub> O <sub>2</sub>        | 224.1 | [M+H] <sup>+</sup>         | 225.0658539 | 225.066 | 0.726  |  |
| 2-Heptyl-4-hydroxyquinoline N-oxide                                            | 28.4 | C <sub>16</sub> H <sub>21</sub> NO <sub>2</sub>                     | 259.2 | [M+H] <sup>-</sup>         | 242.1539407 | 242.154 | 1.026  |  |

|                                                                                                                                                                                   |           |                                                 |       | H2O)+                      |             |         |        |
|-----------------------------------------------------------------------------------------------------------------------------------------------------------------------------------|-----------|-------------------------------------------------|-------|----------------------------|-------------|---------|--------|
| Latanoprost lactone diol                                                                                                                                                          | 29.4<br>8 | C <sub>18</sub> H <sub>24</sub> O <sub>4</sub>  | 304.2 | [M+H] <sup>+</sup>         | 305.1747357 | 305.173 | 6.2    |
| Sclareolide                                                                                                                                                                       | 29.6<br>3 | C <sub>16</sub> H <sub>26</sub> O <sub>2</sub>  | 250.2 | [M+Na] <sup>+</sup>        | 273.1825008 | 273.185 | 9.091  |
| 2-heptylquinolin-4(1H)-one                                                                                                                                                        | 30.3      | C <sub>16</sub> H <sub>21</sub> NO              | 243.2 | [M+H] <sup>+</sup>         | 244.1695907 | 244.17  | 0.536  |
| xi-5-Dodecanolide                                                                                                                                                                 | 31.2<br>1 | C <sub>12</sub> H <sub>22</sub> O <sub>2</sub>  | 198.2 | [M+Na] <sup>+</sup>        | 221.1512006 | 221.154 | 11.43  |
| Koninginin A                                                                                                                                                                      | 31.7<br>7 | C <sub>16</sub> H <sub>28</sub> O <sub>4</sub>  | 284.2 | [M+Na] <sup>+</sup>        | 307.1879801 | 307.19  | 7.893  |
| Koninginin E                                                                                                                                                                      | 31.8<br>2 | C <sub>16</sub> H <sub>26</sub> O <sub>4</sub>  | 282.2 | [M-H] <sup>-</sup>         | 281.1758329 | 281.176 | 1.187  |
| Andrographolide                                                                                                                                                                   | 32.0<br>3 | C <sub>20</sub> H <sub>30</sub> O <sub>5</sub>  | 350.2 | [M+H-<br>H2O] <sup>+</sup> | 333.2060358 | 333.204 | 5.345  |
| NCGC00380405-01_C24H35NO5_1H-<br>Cycloundec[d]isoindole-1,12,15-trione,<br>2,3,3a,4,6a,9,10,11,13,14-decahydro-11,13-<br>dihydroxy-4,5,8-trimethyl-3-(2-<br>methylpropyl)-, (7E)- | 32.3<br>2 | C <sub>24</sub> H <sub>35</sub> NO <sub>5</sub> | 417.3 | [M+H] <sup>+</sup>         | 418.2587997 | 418.248 | 26.739 |
| Bisabolol oxide A                                                                                                                                                                 | 32.4<br>3 | C <sub>15</sub> H <sub>26</sub> O <sub>2</sub>  | 238.2 | [M+Na] <sup>+</sup>        | 261.1825008 | 261.184 | 5.785  |
| Sedanolide                                                                                                                                                                        | 32.4<br>5 | C <sub>12</sub> H <sub>18</sub> O <sub>2</sub>  | 194.1 | [M+H] <sup>+</sup>         | 195.1379563 | 195.138 | 1.656  |
| 2,2,5,7,8-PENTAMETHYLCHROMAN-6-<br>OL                                                                                                                                             | 32.5<br>7 | C <sub>14</sub> H <sub>20</sub> O <sub>2</sub>  | 220.1 | [M+H] <sup>+</sup>         | 221.1536063 | 221.154 | 1.1    |

|                                          |           |                                                               |       |                                         |             |         |             |
|------------------------------------------|-----------|---------------------------------------------------------------|-------|-----------------------------------------|-------------|---------|-------------|
| 3,7-Epoxyecaryophyllan-6-One             | 34.0<br>6 | C <sub>15</sub> H <sub>24</sub> O <sub>2</sub>                | 236.2 | [M+HCO<br>2]-                           | 281.1758329 | 281.176 | 1.187       |
| Phthalic anhydride                       | 35.1<br>4 | C <sub>8</sub> H <sub>4</sub> O <sub>3</sub>                  | 148   | [M+H] <sup>+</sup>                      | 149.0233204 | 149.023 | 1.33        |
| 2-ETHYLHEXANAL ETHYLENE GLYCOL<br>ACETAL | 38.8<br>3 | C <sub>10</sub> H <sub>20</sub> O <sub>2</sub>                | 172.1 | [2M-H] <sup>-</sup>                     | 343.2853833 | 343.285 | 1.256       |
| Deoxykhivorin                            | 39.7<br>8 | C <sub>32</sub> H <sub>42</sub> O <sub>9</sub>                | 570.3 | [M+Na] <sup>+</sup>                     | 593.2721036 | 593.276 | 6.018       |
| Pheophorbide a                           | 40.2<br>7 | C <sub>35</sub> H <sub>36</sub> N <sub>4</sub> O <sub>5</sub> | 592.3 | [M+H] <sup>+</sup>                      | 593.2758467 | 593.276 | 0.767       |
| Dopamine                                 | 1.36      | C <sub>8</sub> H <sub>11</sub> NO <sub>2</sub>                | 153.1 | [M+H-<br>H <sub>2</sub> O] <sup>+</sup> | 136.0756904 | 136.076 | 1.271       |
| Phenylacetic acid                        | 1.37      | C <sub>8</sub> H <sub>8</sub> O <sub>2</sub>                  | 136.1 | [M+H-<br>H <sub>2</sub> O] <sup>+</sup> | 119.0491413 | 119.067 | 152.19<br>7 |
| 4-Aminobenzoic acid                      | 1.45      | C <sub>7</sub> H <sub>7</sub> NO <sub>2</sub>                 | 136   | [M+H] <sup>+</sup>                      | 137.0471299 | 137.046 | 8.712       |
| p-Toluamide                              | 1.63      | C <sub>8</sub> H <sub>9</sub> NO                              | 135.1 | [2M-H] <sup>-</sup>                     | 269.1295514 | 269.131 | 5.052       |
| Betaxolol                                | 7.08      | C <sub>18</sub> H <sub>29</sub> NO <sub>3</sub>               | 307.2 | [M+Na] <sup>+</sup>                     | 330.2039645 | 330.203 | 2.125       |
| 5-Amino-2-methoxyphenol                  | 7.71      | C <sub>7</sub> H <sub>9</sub> NO <sub>2</sub>                 | 139.1 | [M-H] <sup>-</sup>                      | 138.0560521 | 138.055 | 8.695       |
| 3,5-Dihydroxybenzyl alcohol              | 8.68      | C <sub>7</sub> H <sub>8</sub> O <sub>3</sub>                  | 140   | [M-H-<br>H <sub>2</sub> O] <sup>-</sup> | 121.029503  | 121.028 | 11.885      |
| 4-Methylhippuric acid                    | 11.8<br>6 | C <sub>10</sub> H <sub>11</sub> NO <sub>3</sub>               | 193.1 | [M-H] <sup>-</sup>                      | 192.0666168 | 192.066 | 3.974       |
| ANISYL ISOVALERATE                       | 14.9      | C <sub>13</sub> H <sub>18</sub> O <sub>3</sub>                | 222.1 | [M+H] <sup>+</sup>                      | 223.1328709 | 223.133 | 0.916       |

|                                                                                       |      |                                                               |       |                                         |             |         |       |
|---------------------------------------------------------------------------------------|------|---------------------------------------------------------------|-------|-----------------------------------------|-------------|---------|-------|
|                                                                                       | 1    |                                                               |       |                                         |             |         |       |
| 2-(1-METHOXYBENZYL)CYCLOPENTANONE                                                     | 14.9 | C <sub>13</sub> H <sub>16</sub> O <sub>2</sub>                | 204.1 | [M+H] <sup>+</sup>                      | 205.1223062 | 205.123 | 1.647 |
|                                                                                       | 1    |                                                               |       |                                         |             |         |       |
| BENZALACETONE                                                                         | 17.9 | C <sub>10</sub> H <sub>10</sub> O                             | 146.1 | [M+H] <sup>+</sup>                      | 147.0804414 | 147.081 | 0.453 |
|                                                                                       | 4    |                                                               |       |                                         |             |         |       |
| Tyramine                                                                              | 21.1 | C <sub>8</sub> H <sub>11</sub> NO                             | 137.1 | [M-H] <sup>-</sup>                      | 136.0767875 | 136.075 | 9.838 |
|                                                                                       | 5    |                                                               |       |                                         |             |         |       |
| P-CRESOL                                                                              | 22.6 | C <sub>7</sub> H <sub>8</sub> O                               | 108.1 | [M+H] <sup>+</sup>                      | 109.0647913 | 109.065 | 2.861 |
|                                                                                       | 22.6 |                                                               |       |                                         |             |         |       |
| Pentamidine                                                                           | 23.9 | C <sub>19</sub> H <sub>24</sub> N <sub>4</sub> O <sub>2</sub> | 340.2 | [M-H] <sup>-</sup>                      | 339.1826496 | 339.181 | 4.97  |
|                                                                                       | 5    |                                                               |       |                                         |             |         |       |
| NCGC00160195-01!2-(5-Hydroxymethyl-8-methyl-3-oxa-bicyclo[3.3.1]non-7-en-2-yl)-phenol | 25.6 | C <sub>16</sub> H <sub>20</sub> O <sub>3</sub>                | 260.1 | [M+H] <sup>+</sup>                      | 261.148521  | 261.149 | 0.46  |
|                                                                                       | 25.6 |                                                               |       |                                         |             |         |       |
| Bisoprolol                                                                            | 27.5 | C <sub>18</sub> H <sub>31</sub> NO <sub>4</sub>               | 325.2 | [M+HCO<br>2] <sup>-</sup>               | 370.2235113 | 370.223 | 0.926 |
|                                                                                       | 5    |                                                               |       |                                         |             |         |       |
| BENZALDEHYDE DIETHYLACETAL                                                            | 27.8 | C <sub>11</sub> H <sub>16</sub> O <sub>2</sub>                | 180.1 | [M+H] <sup>+</sup>                      | 181.1223062 | 181.122 | 1.259 |
|                                                                                       | 1    |                                                               |       |                                         |             |         |       |
| 3,4-Dimethylbenzaldehyde                                                              | 28.7 | C <sub>9</sub> H <sub>10</sub> O                              | 134.1 | [M+H] <sup>+</sup>                      | 135.0804414 | 135.081 | 1.177 |
|                                                                                       | 9    |                                                               |       |                                         |             |         |       |
| Olivetol                                                                              | 29.2 | C <sub>11</sub> H <sub>16</sub> O <sub>2</sub>                | 180.1 | [M+H] <sup>+</sup>                      | 181.1223062 | 181.122 | 0.827 |
|                                                                                       | 4    |                                                               |       |                                         |             |         |       |
| 4-Phenylbutyric acid                                                                  | 30.0 | C <sub>10</sub> H <sub>12</sub> O <sub>2</sub>                | 164.1 | [M+H-<br>H <sub>2</sub> O] <sup>+</sup> | 147.0804414 | 147.08  | 1.057 |
|                                                                                       | 6    |                                                               |       |                                         |             |         |       |
| 3,4-Dimethylbenzoic acid                                                              | 30.0 | C <sub>9</sub> H <sub>10</sub> O <sub>2</sub>                 | 150.1 | [M+H] <sup>+</sup>                      | 151.075356  | 151.075 | 0.792 |
|                                                                                       | 30.0 |                                                               |       |                                         |             |         |       |

|                                                                |           |                                                 |       |                         |             |         |        |
|----------------------------------------------------------------|-----------|-------------------------------------------------|-------|-------------------------|-------------|---------|--------|
|                                                                | 6         |                                                 |       |                         |             |         |        |
| Latanoprost lactol                                             | 30.7<br>3 | C <sub>18</sub> H <sub>26</sub> O <sub>4</sub>  | 306.2 | [M-H]-                  | 305.1758329 | 305.176 | 0.989  |
| 2-(1-METHOXYBENZYL)CYCLOHEXANONE                               | 31.1<br>9 | C <sub>14</sub> H <sub>18</sub> O <sub>2</sub>  | 218.1 | [M+H]+                  | 219.1379563 | 219.138 | 0.749  |
| shogaol                                                        | 31.3<br>2 | C <sub>17</sub> H <sub>24</sub> O <sub>3</sub>  | 276.2 | [M+H]+                  | 277.1798211 | 277.18  | 1.049  |
| 6-Gingerol                                                     | 31.3<br>5 | C <sub>17</sub> H <sub>26</sub> O <sub>4</sub>  | 294.2 | [M+H]+                  | 295.1903858 | 295.194 | 13.219 |
| (3S,4S)-5-BENZYLOXY-3-METHOXYETHOXYMETHOXY-4-METHYLPENTAN-2-OL | 31.3<br>8 | C <sub>17</sub> H <sub>28</sub> O <sub>5</sub>  | 312.2 | [M+Na]+                 | 335.1828947 | 335.183 | 0.928  |
| Nadolol                                                        | 31.6      | C <sub>17</sub> H <sub>27</sub> NO <sub>4</sub> | 309.2 | [M-H]-                  | 308.1867319 | 308.193 | 18.787 |
| 3-PHENYLPROPANOL                                               | 31.8<br>9 | C <sub>9</sub> H <sub>12</sub> O                | 136.1 | [M+H-H <sub>2</sub> O]+ | 119.0855268 | 119.086 | 1.186  |
| 1-Phenyl-1-hexyn-3-ol                                          | 31.9<br>3 | C <sub>12</sub> H <sub>14</sub> O               | 174.1 | [M+H-H <sub>2</sub> O]+ | 157.1011768 | 157.101 | 0.368  |
| Methyleugenol                                                  | 31.9<br>4 | C <sub>11</sub> H <sub>14</sub> O <sub>2</sub>  | 178.1 | [M+H]+                  | 179.1066561 | 179.107 | 0.766  |
| 4-BENZYLOXY-3-HYDROXY-2-METHYL-1-BUTENE                        | 31.9<br>4 | C <sub>12</sub> H <sub>16</sub> O <sub>2</sub>  | 192.1 | [M+H]+                  | 193.1223062 | 193.123 | 1.448  |
| 4-BENZYLOXY-2-METHYL-1,3-BUTADIENE                             | 31.9<br>4 | C <sub>12</sub> H <sub>14</sub> O               | 174.1 | [M+H]+                  | 175.1117415 | 175.112 | 0.896  |
| 2,4-dimethylphenylformamid                                     | 32.5      | C <sub>9</sub> H <sub>11</sub> NO               | 149.1 | [M+HCO                  | 194.0822668 | 194.082 | 2.835  |

|                                          |           |                                                  |       |                             |             |         |        |
|------------------------------------------|-----------|--------------------------------------------------|-------|-----------------------------|-------------|---------|--------|
|                                          | 4         |                                                  |       | 2]-                         |             |         |        |
| Methylgingerol                           | 32.8<br>5 | C <sub>18</sub> H <sub>28</sub> O <sub>4</sub>   | 308.2 | [M-H]-                      | 307.1914829 | 307.191 | 0.949  |
| Cannabidiolic acid                       | 33.4<br>5 | C <sub>22</sub> H <sub>30</sub> O <sub>4</sub>   | 358.2 | [M+H]+                      | 359.2216859 | 359.219 | 6.815  |
| 6-Acetyl-1,1,2,4,4,7-hexamethyltetralin  | 33.7<br>8 | C <sub>18</sub> H <sub>26</sub> O                | 258.2 | [M+H]+                      | 259.2056419 | 259.206 | 0.585  |
| Dodecylbenzenesulfonic acid              | 35.7<br>8 | C <sub>18</sub> H <sub>30</sub> O <sub>3</sub> S | 326.2 | [M-H]-                      | 325.1842894 | 325.184 | 1.212  |
| MANNITOL                                 | 1.05      | C <sub>6</sub> H <sub>14</sub> O <sub>6</sub>    | 182.1 | [M+H-<br>H <sub>2</sub> O]+ | 165.0757499 | 165.076 | 1.079  |
| Erythrose                                | 1.06      | C <sub>4</sub> H <sub>8</sub> O <sub>4</sub>     | 120   | [M+HCO<br>2]-               | 165.0404616 | 165.038 | 16.296 |
| Melezitose                               | 1.07      | C <sub>18</sub> H <sub>32</sub> O <sub>16</sub>  | 504.2 | [M+Na]+                     | 527.1582556 | 527.159 | 2.341  |
| GLCA                                     | 1.08      | C <sub>6</sub> H <sub>10</sub> O <sub>7</sub>    | 194   | [M-H]-                      | 193.0353762 | 193.034 | 4.663  |
| 4-Fluoro-.alpha.-pyrrolidinobutiophenone | 1.09      | C <sub>15</sub> H <sub>20</sub> FNO              | 249.3 | [M+H]+                      | 236.1445189 | 236.142 | 40.244 |
| Sorbitol                                 | 1.09      | C <sub>6</sub> H <sub>14</sub> O <sub>6</sub>    | 182.1 | [M-H-<br>H <sub>2</sub> O]- | 163.061197  | 163.06  | 10.162 |
| Arabinonic acid                          | 1.1       | C <sub>5</sub> H <sub>10</sub> O <sub>6</sub>    | 166   | [2M-H]-                     | 331.0881996 | 331.084 | 13.526 |
| Glycerate                                | 1.1       | C <sub>3</sub> H <sub>6</sub> O <sub>4</sub>     | 106   | [M-H]-                      | 105.0193322 | 105.018 | 14.384 |
| Xylose                                   | 1.1       | C <sub>5</sub> H <sub>10</sub> O <sub>5</sub>    | 150.1 | [M-H-<br>H <sub>2</sub> O]- | 131.0349823 | 131.034 | 10.141 |

|                                                                                                    |           |                                                     |       |                             |             |         |        |
|----------------------------------------------------------------------------------------------------|-----------|-----------------------------------------------------|-------|-----------------------------|-------------|---------|--------|
| Acetamidopropanal                                                                                  | 1.11      | C <sub>5</sub> H <sub>9</sub> NO <sub>2</sub>       | 115.1 | [M-H]-                      | 114.0560521 | 114.054 | 14.161 |
| Threonic acid                                                                                      | 1.14      | C <sub>4</sub> H <sub>8</sub> O <sub>5</sub>        | 136   | [2M-H]-                     | 271.0670703 | 271.054 | 66.382 |
| Sorbitol 6-phosphate                                                                               | 1.3       | C <sub>6</sub> H <sub>15</sub> O <sub>9</sub> P     | 262   | [M-H]-                      | 261.0380922 | 261.04  | 57.815 |
| Salicylaldehyde                                                                                    | 1.59      | C <sub>7</sub> H <sub>6</sub> O <sub>2</sub>        | 122   | [M+H]+                      | 123.0440559 | 123.044 | 1.898  |
| Ethyl glucuronide                                                                                  | 1.64      | C <sub>8</sub> H <sub>14</sub> O <sub>7</sub>       | 222.1 | [M+HCO<br>2]-               | 267.0721556 | 267.073 | 3.168  |
| D-Glucose                                                                                          | 1.91      | C <sub>6</sub> H <sub>12</sub> O <sub>6</sub>       | 180.1 | [M-H-<br>H <sub>2</sub> O]- | 161.045547  | 161.044 | 7.579  |
| Phenethylamine glucuronide                                                                         | 3.06      | C <sub>14</sub> H <sub>19</sub> N<br>O <sub>6</sub> | 297.1 | [M-H-<br>H <sub>2</sub> O]- | 278.1033962 | 278.107 | 11.908 |
| N-Acetylmuramic Acid                                                                               | 3.12      | C <sub>11</sub> H <sub>19</sub> NO <sub>8</sub>     | 293.1 | [M-H]-                      | 292.1037901 | 292.104 | 1.071  |
| PANTOTHENATE                                                                                       | 4.15      | C <sub>9</sub> H <sub>17</sub> NO <sub>5</sub>      | 219.1 | [M+H]+                      | 220.1179491 | 220.118 | 1.417  |
| VITAMIN B5                                                                                         | 4.17      | C <sub>9</sub> H <sub>17</sub> NO <sub>5</sub>      | 219.1 | [M+H]+                      | 220.1179491 | 220.118 | 1.417  |
| 2-(hydroxymethyl)-6-[[[(1R,4S)-2,2,4-trimethyl-3-oxabicyclo[2.2.2]octan-5-yl]oxy]oxane-3,4,5-triol | 13.6<br>4 | C <sub>16</sub> H <sub>28</sub> O <sub>7</sub>      | 332.2 | [M-H-<br>H <sub>2</sub> O]- | 313.1656621 | 313.165 | 0.788  |
| Thymoquinone                                                                                       | 17.9<br>1 | C <sub>10</sub> H <sub>12</sub> O <sub>2</sub>      | 164.1 | [M+H]+                      | 165.0910061 | 165.091 | 0.565  |
| 4-Oxo-2-nonenal                                                                                    | 20.4      | C <sub>9</sub> H <sub>14</sub> O <sub>2</sub>       | 154.1 | [M+H-<br>H <sub>2</sub> O]+ | 137.0960915 | 137.096 | 0.835  |
| 13,14-Dihydro-15-ketotetranorprostaglandin E2                                                      | 21.6<br>3 | C <sub>16</sub> H <sub>26</sub> O <sub>5</sub>      | 298.2 | [M+Na]+                     | 321.1672446 | 321.167 | 0.717  |

|                                                                                                               |           |                                                               |       |                                         |             |         |        |
|---------------------------------------------------------------------------------------------------------------|-----------|---------------------------------------------------------------|-------|-----------------------------------------|-------------|---------|--------|
| LY-255283                                                                                                     | 23.2<br>3 | C <sub>19</sub> H <sub>28</sub> N <sub>4</sub> O <sub>3</sub> | 360.2 | [M+H-<br>H <sub>2</sub> O] <sup>+</sup> | 343.2128525 | 343.212 | 2.732  |
| JASMONE                                                                                                       | 25.5      | C <sub>11</sub> H <sub>16</sub> O                             | 164.1 | [M+H] <sup>+</sup>                      | 165.1273916 | 165.128 | 1.207  |
| 13,14-Dihydro-15-ketotetranorprostaglandin<br>D2                                                              | 25.6<br>4 | C <sub>16</sub> H <sub>26</sub> O <sub>5</sub>                | 298.2 | [M-H-<br>H <sub>2</sub> O] <sup>-</sup> | 279.1601828 | 279.16  | 1.342  |
| 4-Methyl-.alpha.-ethylaminopentiophenone                                                                      | 28.4      | C <sub>14</sub> H <sub>21</sub> NO                            | 219.2 | [M+Na] <sup>+</sup>                     | 242.151535  | 242.154 | 10.574 |
| Polygodial                                                                                                    | 30.0<br>6 | C <sub>15</sub> H <sub>22</sub> O <sub>2</sub>                | 234.2 | [M+H] <sup>+</sup>                      | 235.1692564 | 235.169 | 0.776  |
| 4-Hydroxy-3-(3-methyl-2-<br>butenyl)acetophenone                                                              | 30.2<br>1 | C <sub>13</sub> H <sub>16</sub> O <sub>2</sub>                | 204.1 | [M+H] <sup>+</sup>                      | 205.1223062 | 205.123 | 1.329  |
| Isophorone                                                                                                    | 31.8<br>6 | C <sub>9</sub> H <sub>14</sub> O                              | 138.1 | [M+H-<br>H <sub>2</sub> O] <sup>+</sup> | 121.1011768 | 121.101 | 0.615  |
| 2-Adamantanone                                                                                                | 31.9<br>7 | C <sub>10</sub> H <sub>14</sub> O                             | 150.1 | [M+H-<br>H <sub>2</sub> O] <sup>+</sup> | 133.1011768 | 133.101 | 0.834  |
| (4S,5S,6R)-5-methoxy-4-[(2R,3R)-2-methyl-<br>3-(3-methylbut-2-enyl)oxiran-2-yl]-1-<br>oxaspiro[2.5]octan-6-ol | 33.1<br>3 | C <sub>16</sub> H <sub>26</sub> O <sub>4</sub>                | 282.2 | [M+H-<br>H <sub>2</sub> O] <sup>+</sup> | 265.1798211 | 265.18  | 1.568  |
| Acetildenafil                                                                                                 | 35.6<br>2 | C <sub>25</sub> H <sub>34</sub> N <sub>6</sub> O <sub>3</sub> | 466.3 | [M+H-<br>H <sub>2</sub> O] <sup>+</sup> | 449.2659507 | 449.266 | 1.105  |
| Ethylene glycol tetradecyl ether sulfate                                                                      | 37.2<br>1 | C <sub>16</sub> H <sub>34</sub> O <sub>5</sub> S              | 338.2 | [M-H] <sup>-</sup>                      | 337.2054187 | 337.205 | 1.892  |
| Spiroxamine                                                                                                   | 37.5      | C <sub>18</sub> H <sub>35</sub> NO <sub>2</sub>               | 297.3 | [M+H-<br>H <sub>2</sub> O] <sup>+</sup> | 280.2634911 | 280.264 | 0.607  |
| 3.6.9.12-Tetraoxatetracosan-1-ol                                                                              | 37.5      | C <sub>20</sub> H <sub>42</sub> O <sub>5</sub>                | 362.3 | [M+H] <sup>+</sup>                      | 363.3105009 | 363.311 | 0.785  |

|   |                                                  | 1    |                                                                     |       |                           |             |         |        |
|---|--------------------------------------------------|------|---------------------------------------------------------------------|-------|---------------------------|-------------|---------|--------|
|   | Guanosine                                        | 1.15 | C <sub>10</sub> H <sub>13</sub> N <sub>5</sub> O <sub>5</sub>       | 283.1 | [M+H] <sup>+</sup>        | 284.098945  | 284.101 | 7.07   |
|   | Cytidine                                         | 1.32 | C <sub>9</sub> H <sub>13</sub> N <sub>3</sub> O <sub>5</sub>        | 243.1 | [M+H] <sup>+</sup>        | 244.092797  | 244.093 | 1.163  |
|   | URIDINE                                          | 1.43 | C <sub>9</sub> H <sub>12</sub> N <sub>2</sub> O <sub>6</sub>        | 244.1 | [M+HCO<br>2] <sup>-</sup> | 289.067739  | 289.067 | 18.417 |
|   | CGMP                                             | 1.51 | C <sub>10</sub> H <sub>12</sub> N <sub>5</sub> O <sub>7</sub><br>P  | 345   | [M+H] <sup>+</sup>        | 346.0547108 | 346.055 | 0.986  |
|   | Allopurinol riboside                             | 1.65 | C <sub>10</sub> H <sub>12</sub> N <sub>4</sub> O <sub>5</sub>       | 268.1 | [2M-H] <sup>-</sup>       | 535.1542625 | 535.154 | 0.951  |
|   | Ado                                              | 1.7  | C <sub>10</sub> H <sub>13</sub> N <sub>5</sub> O <sub>4</sub>       | 267.1 | [M+H] <sup>+</sup>        | 268.1040303 | 268.104 | 0.684  |
|   | INO                                              | 1.8  | C <sub>10</sub> H <sub>12</sub> N <sub>4</sub> O <sub>5</sub>       | 268.1 | [2M+H] <sup>+</sup>       | 537.1688154 | 537.169 | 0.687  |
|   | dA                                               | 1.8  | C <sub>10</sub> H <sub>13</sub> N <sub>5</sub> O <sub>3</sub>       | 251.1 | [M+H] <sup>+</sup>        | 252.1091157 | 252.109 | 0.852  |
|   | Adenosine                                        | 1.88 | C <sub>10</sub> H <sub>13</sub> N <sub>5</sub> O <sub>4</sub>       | 267.1 | [M+HCO<br>2] <sup>-</sup> | 312.0949567 | 312.095 | 1.068  |
| 6 | Nucleosides,<br>nucleotides,<br>and<br>analogues |      |                                                                     |       |                           |             |         |        |
|   | Adenylyl(3'-5')cytidine                          | 2.43 | C <sub>19</sub> H <sub>25</sub> N <sub>8</sub> O <sub>1</sub><br>iP | 572.1 | [M-H] <sup>-</sup>        | 571.1307638 | 571.131 | 0.316  |
|   | 2-O-Methyladenosine                              | 2.72 | C <sub>11</sub> H <sub>15</sub> N <sub>5</sub> O <sub>4</sub>       | 281.1 | [M+H] <sup>+</sup>        | 282.1196804 | 282.12  | 1.425  |
|   | 2-O-Methylguanosine                              | 3.12 | C <sub>11</sub> H <sub>15</sub> N <sub>5</sub> O <sub>5</sub>       | 297.1 | [M-H] <sup>-</sup>        | 296.1000421 | 296.1   | 0.987  |
|   | 3'-O-Methylinosine                               | 3.27 | C <sub>11</sub> H <sub>14</sub> N <sub>4</sub> O <sub>5</sub>       | 282.1 | [M-H] <sup>-</sup>        | 281.0891431 | 281.089 | 0.764  |
|   | 1-Methyladenosine                                | 3.45 | C <sub>11</sub> H <sub>15</sub> N <sub>5</sub> O <sub>4</sub>       | 281.1 | [M+H] <sup>+</sup>        | 282.1196804 | 282.12  | 1.206  |
|   | Thymidine                                        | 3.45 | C <sub>10</sub> H <sub>14</sub> N <sub>2</sub> O <sub>5</sub>       | 242.1 | [M+HCO<br>2] <sup>-</sup> | 287.0884744 | 287.086 | 10.133 |

|   |                                                                                                      |                                                                                                  |                                                                    |                                                |                             |                             |             |         |       |
|---|------------------------------------------------------------------------------------------------------|--------------------------------------------------------------------------------------------------|--------------------------------------------------------------------|------------------------------------------------|-----------------------------|-----------------------------|-------------|---------|-------|
|   | N6-Succinyladenosine; LC-tDDA; CE10                                                                  | 4.94                                                                                             | C <sub>14</sub> H <sub>17</sub> N <sub>5</sub> O <sub>8</sub>      | 383.1                                          | [M-H]-                      | 382.1004361                 | 382.101     | 1.062   |       |
|   | Flavin Mononucleotide                                                                                | 9.87                                                                                             | C <sub>17</sub> H <sub>21</sub> N <sub>4</sub> O <sub>9</sub><br>P | 456.1                                          | [M-H]-                      | 455.0973384                 | 455.097     | 0.937   |       |
|   | M1dG                                                                                                 | 33.7<br>6                                                                                        | C <sub>13</sub> H <sub>13</sub> N <sub>5</sub> O <sub>4</sub>      | 303.1                                          | [2M-H]-                     | 605.1862313                 | 605.182     | 7.3     |       |
|   | Pongamol                                                                                             | 1.07                                                                                             | C <sub>18</sub> H <sub>14</sub> O <sub>4</sub>                     | 294.1                                          | [M+H-<br>H <sub>2</sub> O]+ | 277.0859207                 | 277.092     | 23.267  |       |
|   | HPLA                                                                                                 | 1.44                                                                                             | C <sub>9</sub> H <sub>10</sub> O <sub>4</sub>                      | 182.1                                          | [M+H-<br>H <sub>2</sub> O]+ | 165.0546206                 | 165.055     | 2.081   |       |
|   | 4-COUMARATE                                                                                          | 1.48                                                                                             | C <sub>9</sub> H <sub>8</sub> O <sub>3</sub>                       | 164                                            | [M+H]+                      | 165.0546206                 | 165.055     | 2.086   |       |
|   | albocycline                                                                                          | 24.8<br>5                                                                                        | C <sub>18</sub> H <sub>28</sub> O <sub>4</sub>                     | 308.2                                          | [M+H-<br>H <sub>2</sub> O]+ | 291.1954711                 | 291.196     | 1.183   |       |
|   | Brefeldin A                                                                                          | 25.0<br>5                                                                                        | C <sub>16</sub> H <sub>24</sub> O <sub>4</sub>                     | 280.2                                          | [M+H]+                      | 281.1747357                 | 281.175     | 0.923   |       |
| 7 | Phenylpropa<br>noids and<br>polyketides                                                              | (E)-3-(4-methoxyphenyl)-1-[2,4,6-trimethoxy-<br>3-(3-methylbut-2-enyl)phenyl]prop-2-en-1-<br>one | 26.7<br>4                                                          | C <sub>24</sub> H <sub>28</sub> O <sub>5</sub> | 396.2                       | [M-H-<br>H <sub>2</sub> O]- | 377.1758329 | 377.173 | 6.845 |
|   | Octinoxate                                                                                           | 28.4<br>5                                                                                        | C <sub>18</sub> H <sub>26</sub> O <sub>3</sub>                     | 290.2                                          | [M+H]+                      | 291.1954711                 | 291.195     | 0.515   |       |
|   | (1S,2S,3E,7R,11E,13R)-2-Hydroxy-7-methyl<br>6-oxabicyclo[11.3.0]hexadecane-3,11-diene-<br>5,15-dione | 29.1<br>8                                                                                        | C <sub>16</sub> H <sub>22</sub> O <sub>4</sub>                     | 278.2                                          | [M+H-<br>H <sub>2</sub> O]+ | 261.148521                  | 261.149     | 1.634   |       |
|   | ALPHA-HEXYLCINNAMALDEHYDE                                                                            | 31.8<br>6                                                                                        | C <sub>15</sub> H <sub>20</sub> O                                  | 216.2                                          | [M+H-<br>H <sub>2</sub> O]+ | 199.148127                  | 199.148     | 1.337   |       |

|    |                                           |                                                                                                 |      |                                                 |       |                                     |             |         |        |
|----|-------------------------------------------|-------------------------------------------------------------------------------------------------|------|-------------------------------------------------|-------|-------------------------------------|-------------|---------|--------|
|    |                                           | PHENYLETHANOLAMINE                                                                              | 3.1  | C <sub>8</sub> H <sub>11</sub> NO               | 137.1 | [M+H-H <sub>2</sub> O] <sup>+</sup> | 120.0807757 | 120.081 | 2.967  |
|    |                                           | Octylamine                                                                                      | 8.4  | C <sub>8</sub> H <sub>19</sub> N                | 129.2 | [M+H] <sup>+</sup>                  | 130.1590261 | 130.159 | 2.591  |
|    |                                           | 4-(1-Phenylcyclohexyl)morpholine                                                                | 30.2 |                                                 |       |                                     |             |         |        |
|    |                                           |                                                                                                 | 6    | C <sub>16</sub> H <sub>23</sub> NO              | 245.2 | [M+Na] <sup>+</sup>                 | 268.1671851 | 268.169 | 8.606  |
|    |                                           | Lauryldiethanolamine                                                                            | 30.9 |                                                 |       |                                     |             |         |        |
|    |                                           |                                                                                                 | 9    | C <sub>16</sub> H <sub>35</sub> NO <sub>2</sub> | 273.3 | [M+H] <sup>+</sup>                  | 274.2740558 | 274.274 | 0.706  |
| 8  | Organic nitrogen compounds                | N-Methyldodecylamine                                                                            | 31.4 |                                                 |       |                                     |             |         |        |
|    |                                           |                                                                                                 | 7    | C <sub>13</sub> H <sub>29</sub> N               | 199.2 | [M+H] <sup>+</sup>                  | 200.2372764 | 200.238 | 1.269  |
|    |                                           | Tetradecylamine                                                                                 | 31.7 |                                                 |       |                                     |             |         |        |
|    |                                           |                                                                                                 | 7    | C <sub>14</sub> H <sub>31</sub> N               | 213.2 | [M+H] <sup>+</sup>                  | 214.2529264 | 214.253 | 1.035  |
|    |                                           | Lauryldimethylamine Oxide                                                                       | 31.7 |                                                 |       |                                     |             |         |        |
|    |                                           |                                                                                                 | 9    | C <sub>14</sub> H <sub>31</sub> NO              | 229.2 | [M+H] <sup>+</sup>                  | 230.2478411 | 230.246 | 8.836  |
|    |                                           | Oleoyl Ethanolamide                                                                             | 36.1 |                                                 |       |                                     |             |         |        |
|    |                                           |                                                                                                 | 36.1 | C <sub>20</sub> H <sub>39</sub> NO <sub>2</sub> | 325.3 | [M+H] <sup>+</sup>                  | 326.3053559 | 326.305 | 0.708  |
|    |                                           | Enterodiol                                                                                      | 30.0 |                                                 |       |                                     |             |         |        |
|    |                                           |                                                                                                 | 3    | C <sub>18</sub> H <sub>22</sub> O <sub>4</sub>  | 302.2 | [M+H] <sup>+</sup>                  | 303.1590856 | 303.157 | 7.558  |
| 9  | Lignans, neolignans and related compounds | 6-[3-[(3,4-dimethoxyphenyl)methyl]-4-methoxy-2-(methoxymethyl)butyl]-4-methoxy-1,3-benzodioxole | 33.2 |                                                 |       |                                     |             |         |        |
|    |                                           |                                                                                                 | 1    | C <sub>24</sub> H <sub>32</sub> O <sub>7</sub>  | 432.2 | [M+H-H <sub>2</sub> O] <sup>+</sup> | 415.2115151 | 415.216 | 10.543 |
| 10 | Alkaloids and derivatives                 | Hydromorphone                                                                                   | 5.76 |                                                 |       |                                     |             |         |        |
|    |                                           |                                                                                                 | 5.76 | C <sub>17</sub> H <sub>19</sub> NO <sub>3</sub> | 285.1 | [M+H] <sup>+</sup>                  | 286.1437699 | 286.149 | 34.05  |

---
