# Supplementary material
Source: Royal Society of Chemistry journal article supplement (doi:10.1039/d5fo05258k)
Supplement: d5fo05258k3.pdf [file d5fo05258k3.pdf]

**Supplementary Table S2. Compositions of the experimental diets, including macronutrient percentages, caloric density, and daily energy intake in mice fed the normal diet (ND) and high-fat diet (HFD)**

| Ingredient                                         | Normal diet (ND) |                | High-fat diet (HFD) |                |
|----------------------------------------------------|------------------|----------------|---------------------|----------------|
|                                                    | gm (%)           | kcal (%)       | gm (%)              | kcal (%)       |
| Protein                                            | 20               | 20.3           | 26                  | 20             |
| Carbohydrate                                       | 64               | 63.9           | 26                  | 20             |
| Fat                                                | 7                | 15.8           | 35                  | 60             |
| kcal/gm                                            |                  | 4              |                     | 5.26           |
| Daily kcals<br>consumption per mouse<br>(kcal/day) |                  | 10.44 ± 0.3642 |                     | 13.48 ± 0.6351 |
