# Supplementary material
Source: Royal Society of Chemistry journal article supplement (doi:10.1039/d5fo05258k)

## Supplementary Figure 1

(A)

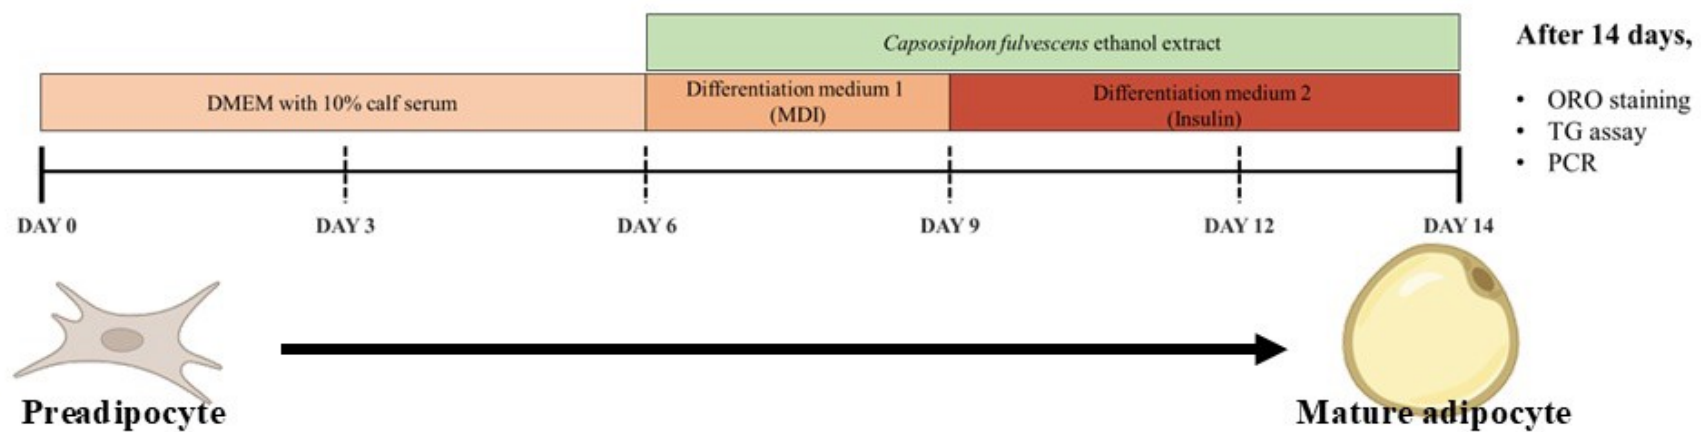

(B)

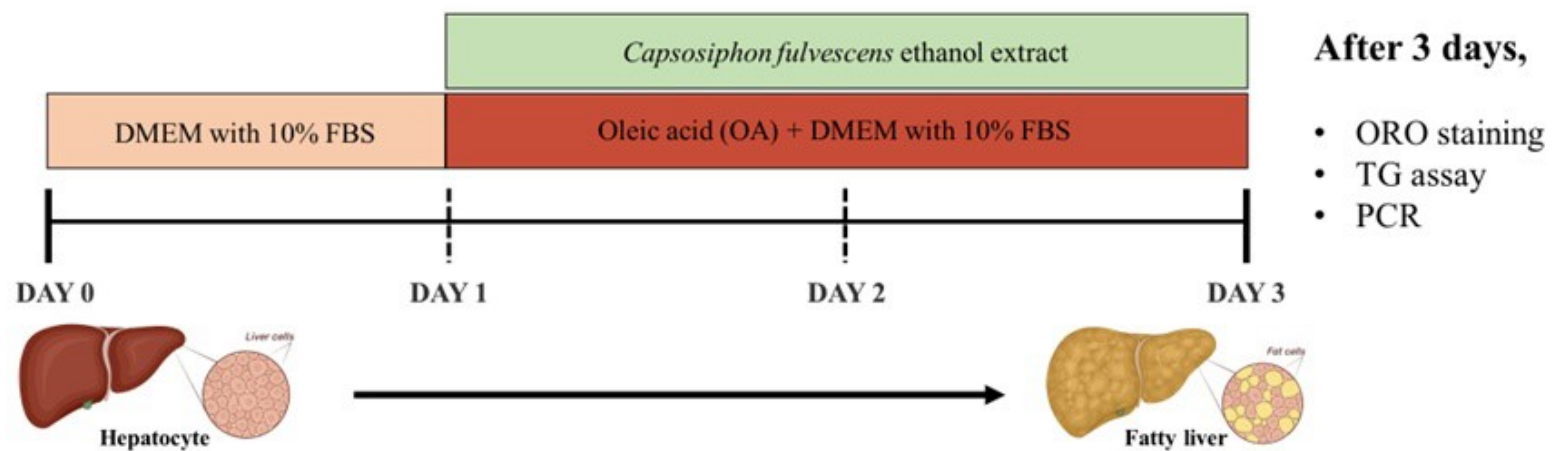

Supplement: d5fo05258k1.pdf [file d5fo05258k1.pdf]
